# Supplementary material for: USP3 promotes osteosarcoma progression via deubiquitinating EPHA2 and activating the PI3K/AKT signaling pathway
Source: PubMed Central journal article supplement (PMC10965993; doi:10.1038/s41419-024-06624-7), 2024-03-26

A

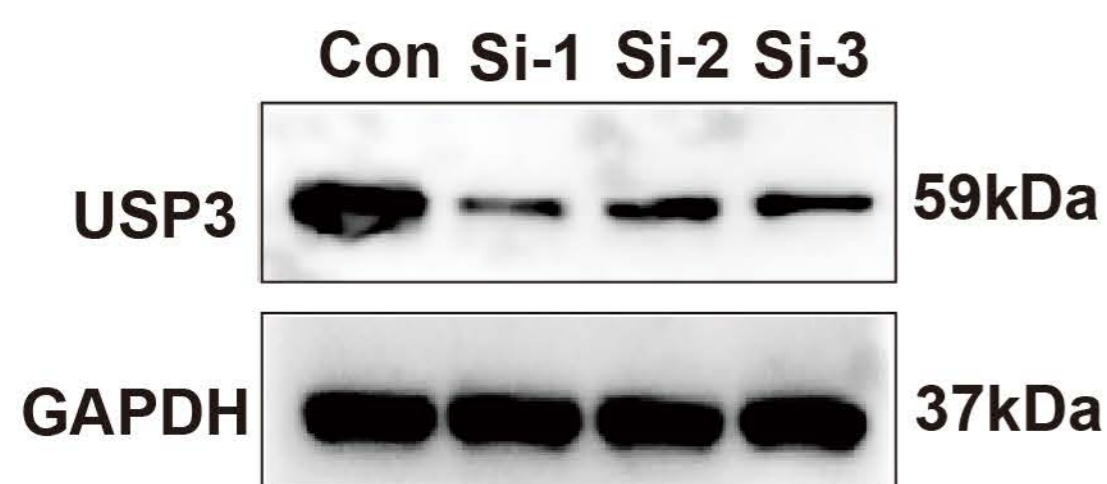

B

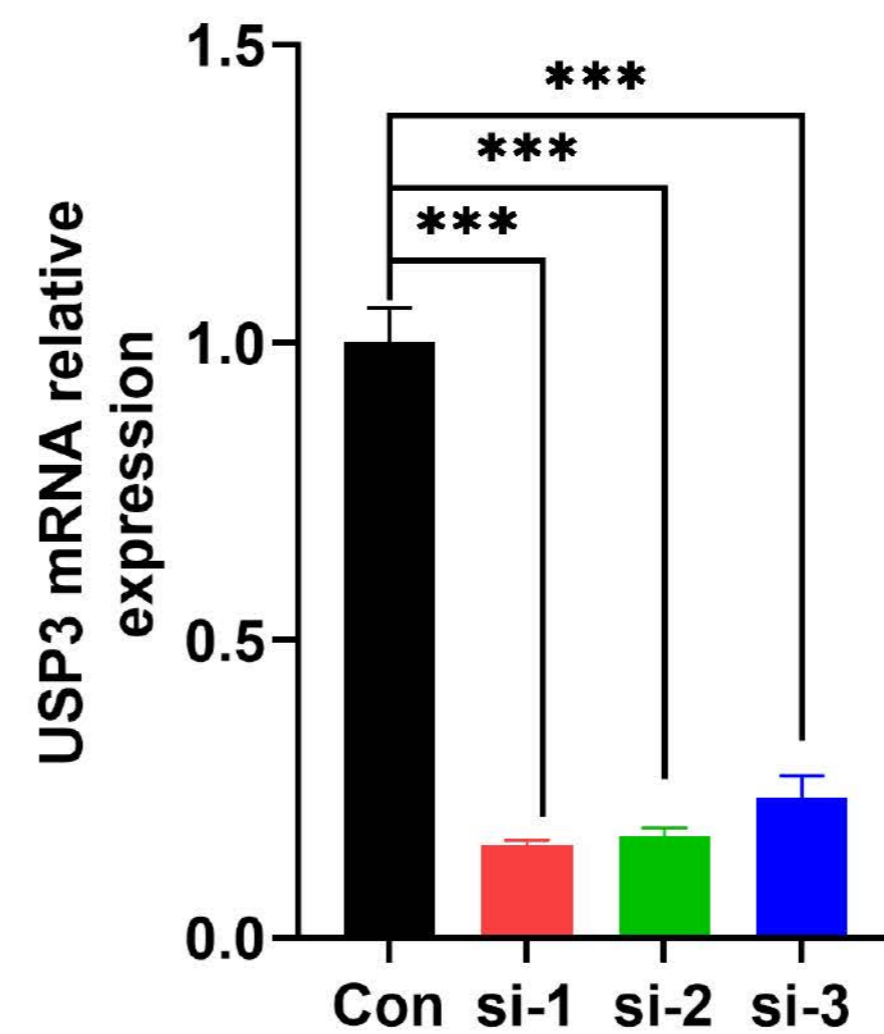

C

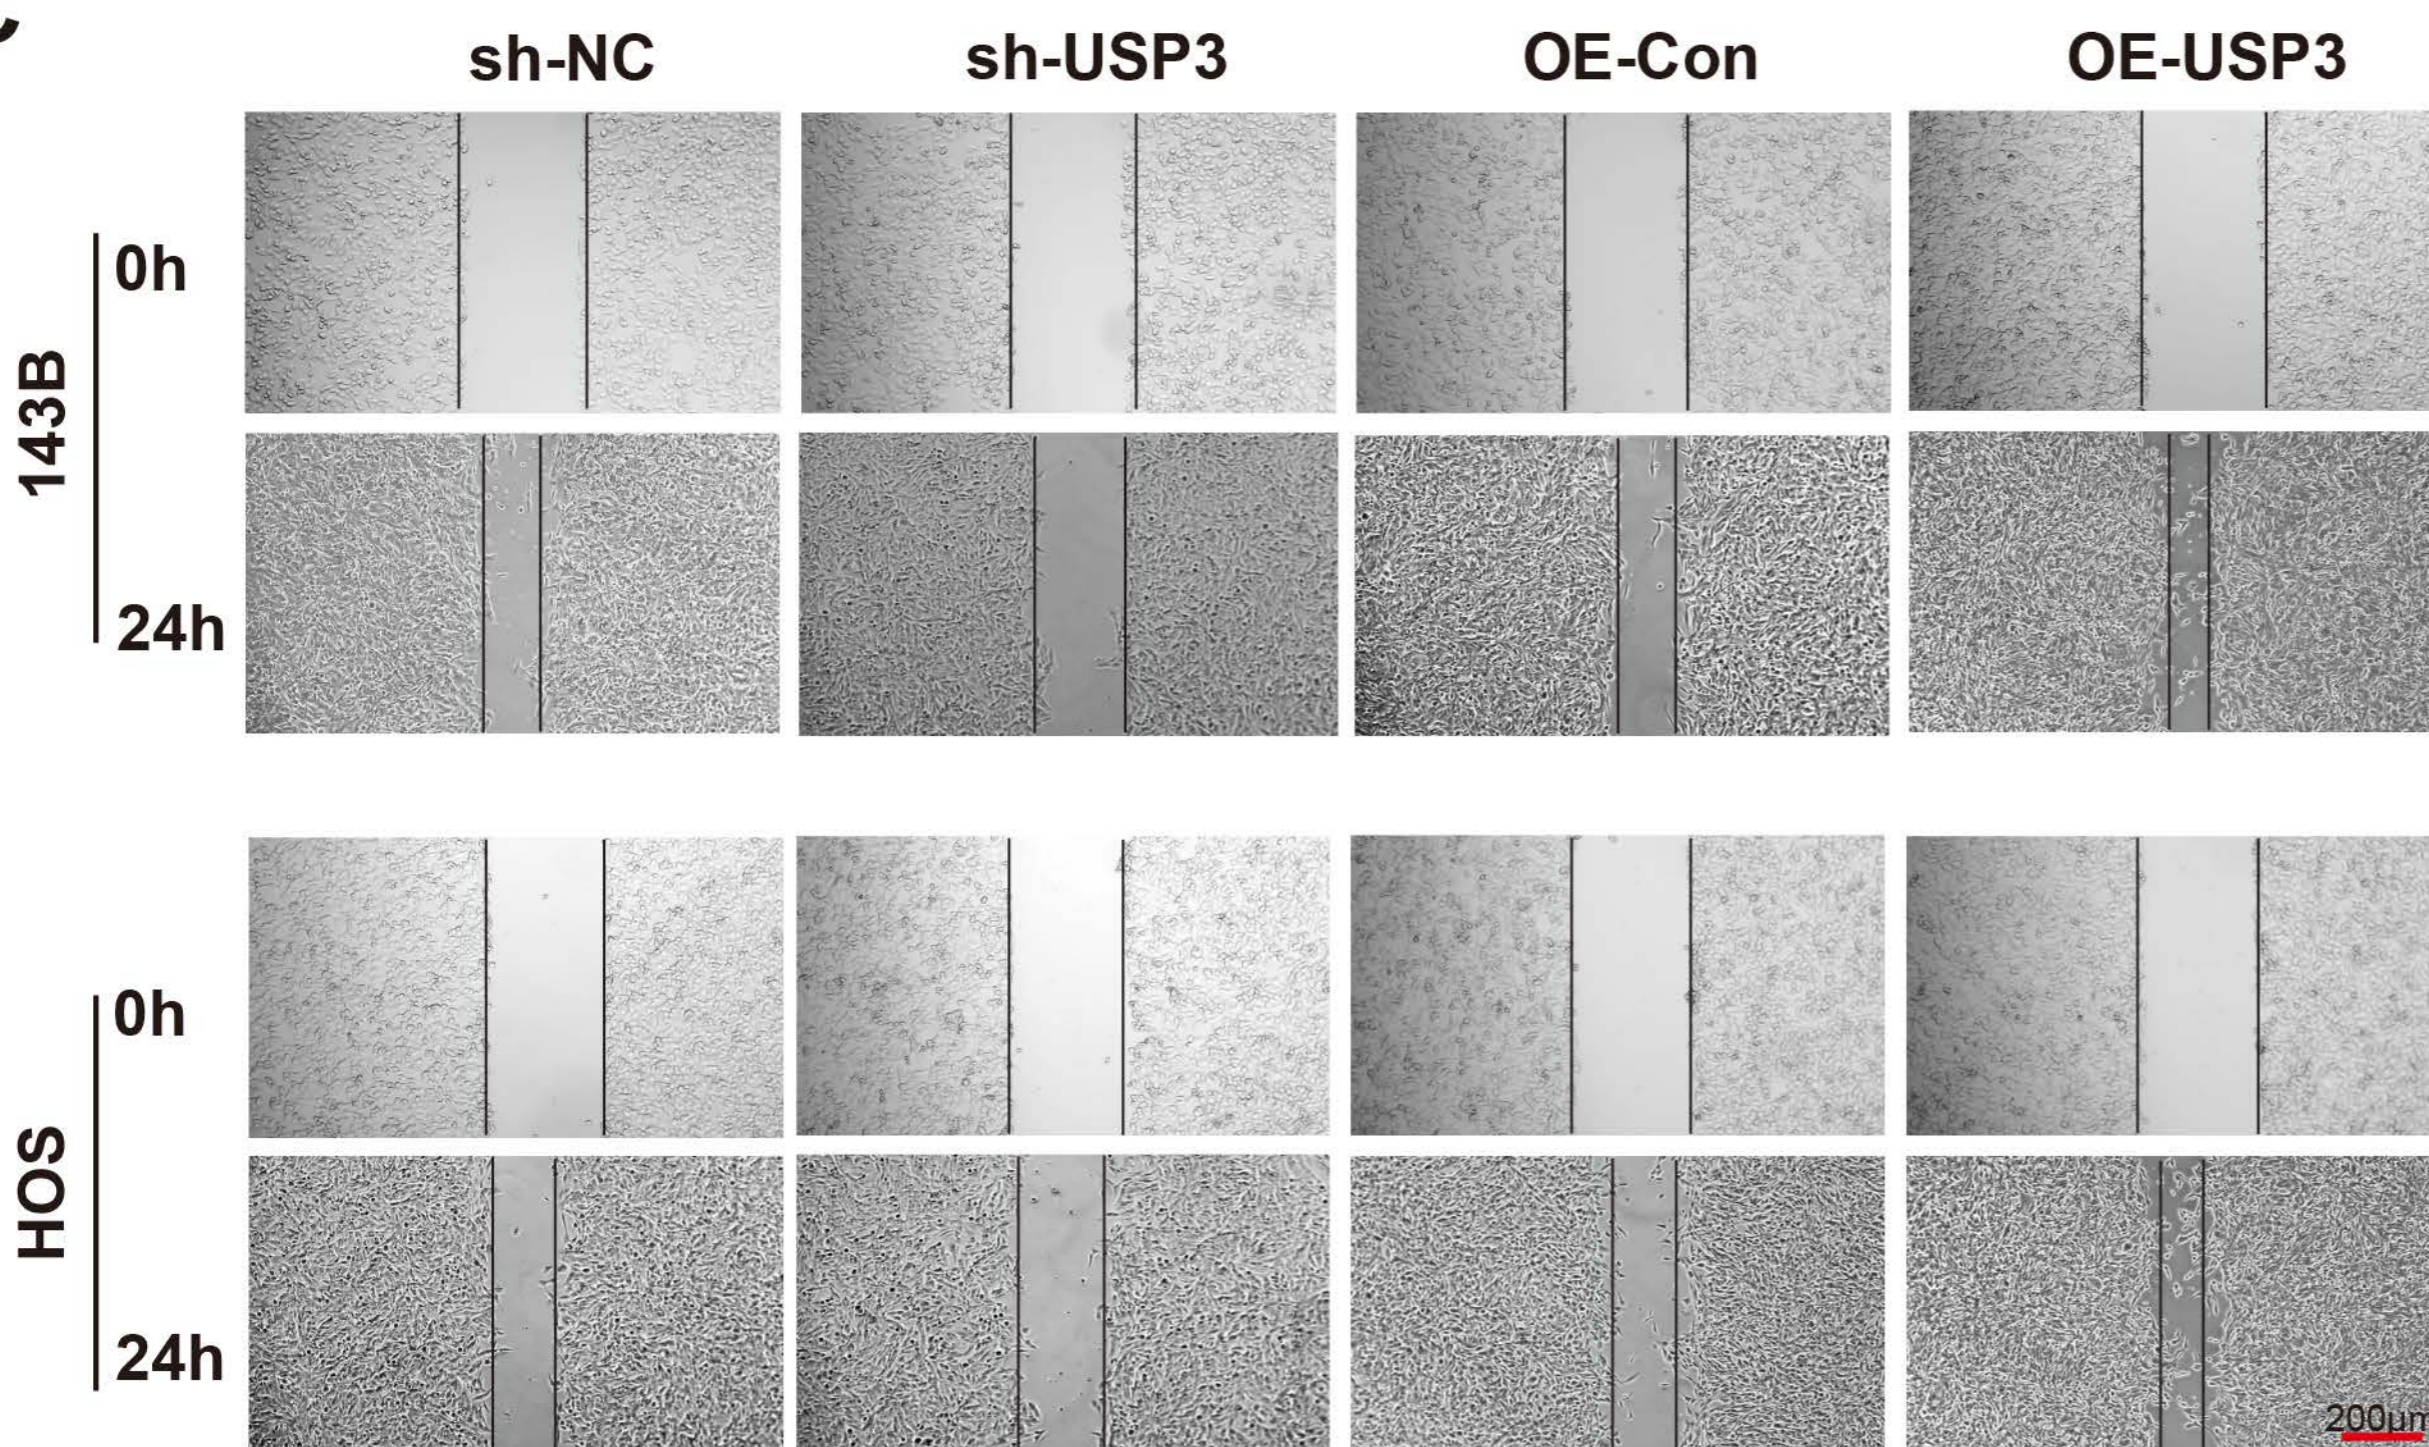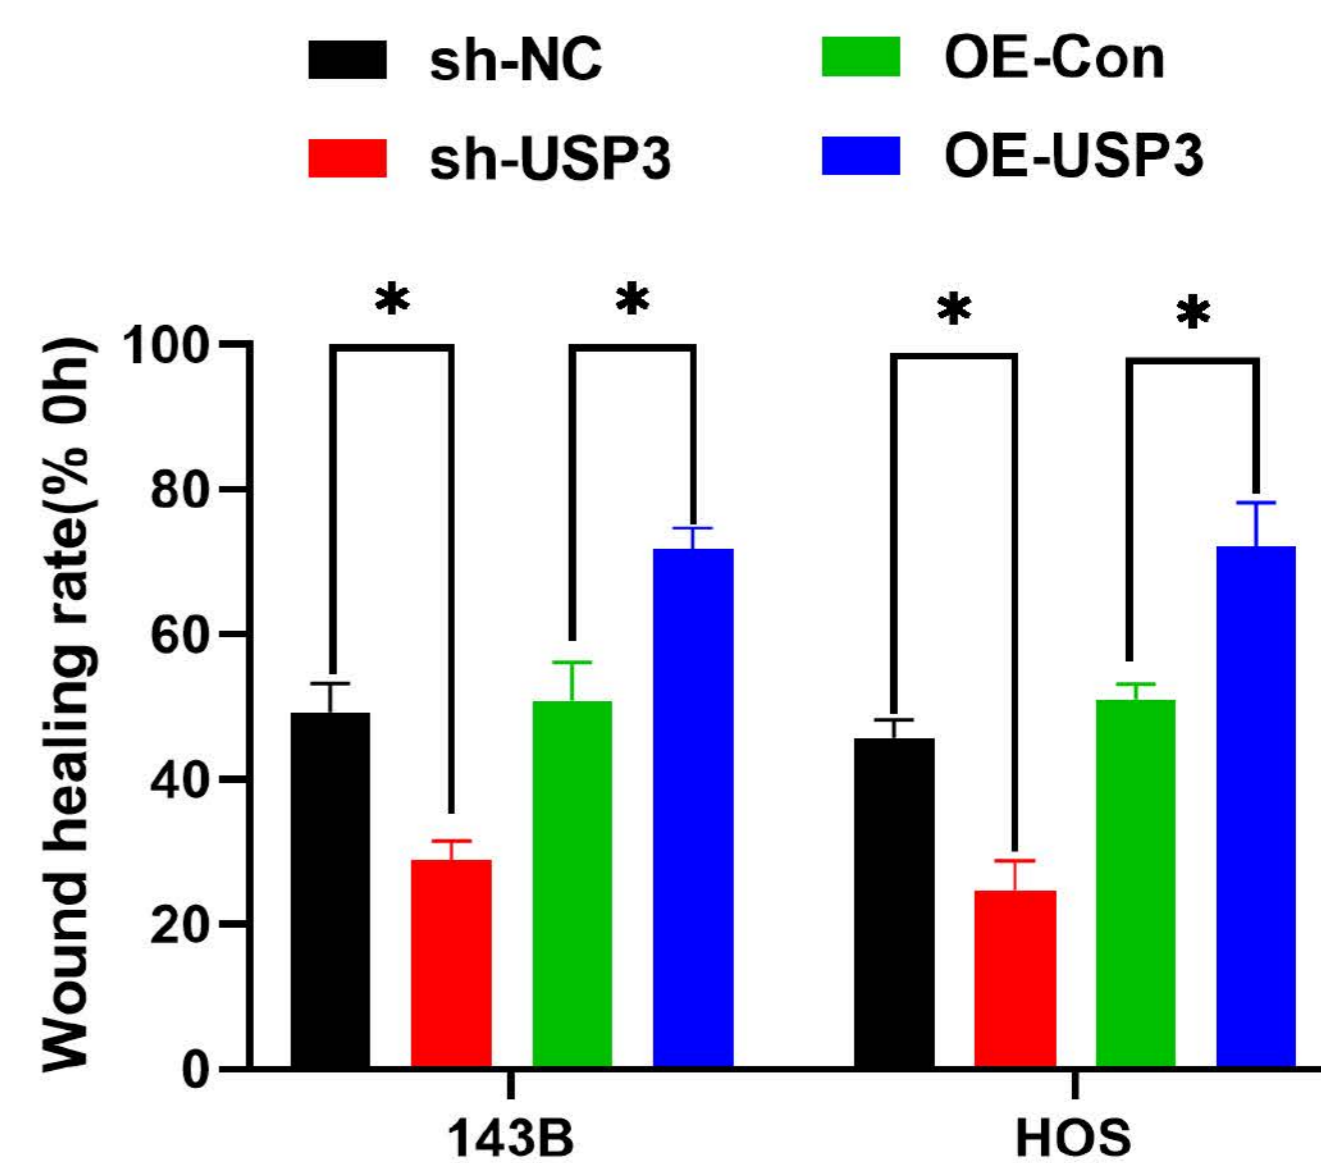

D

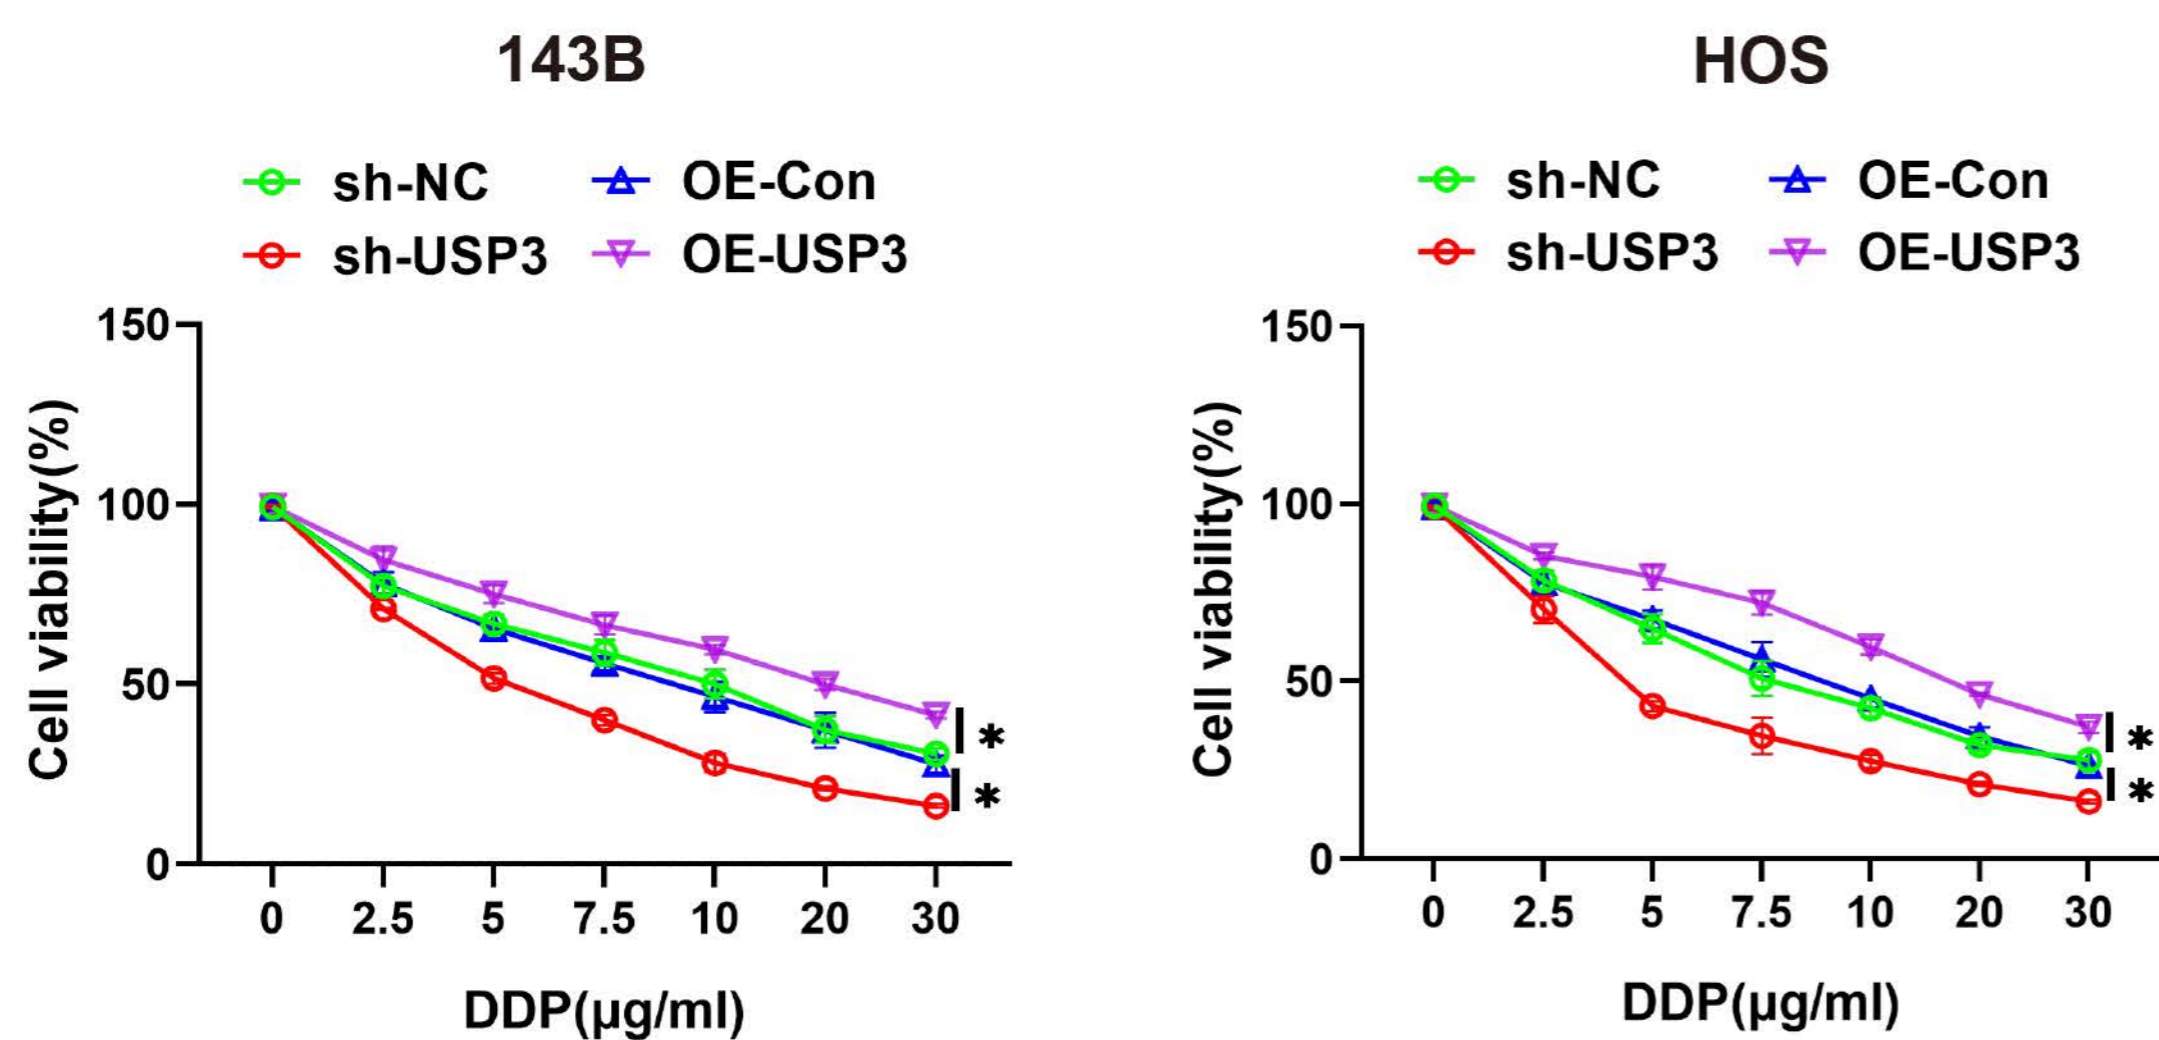

E

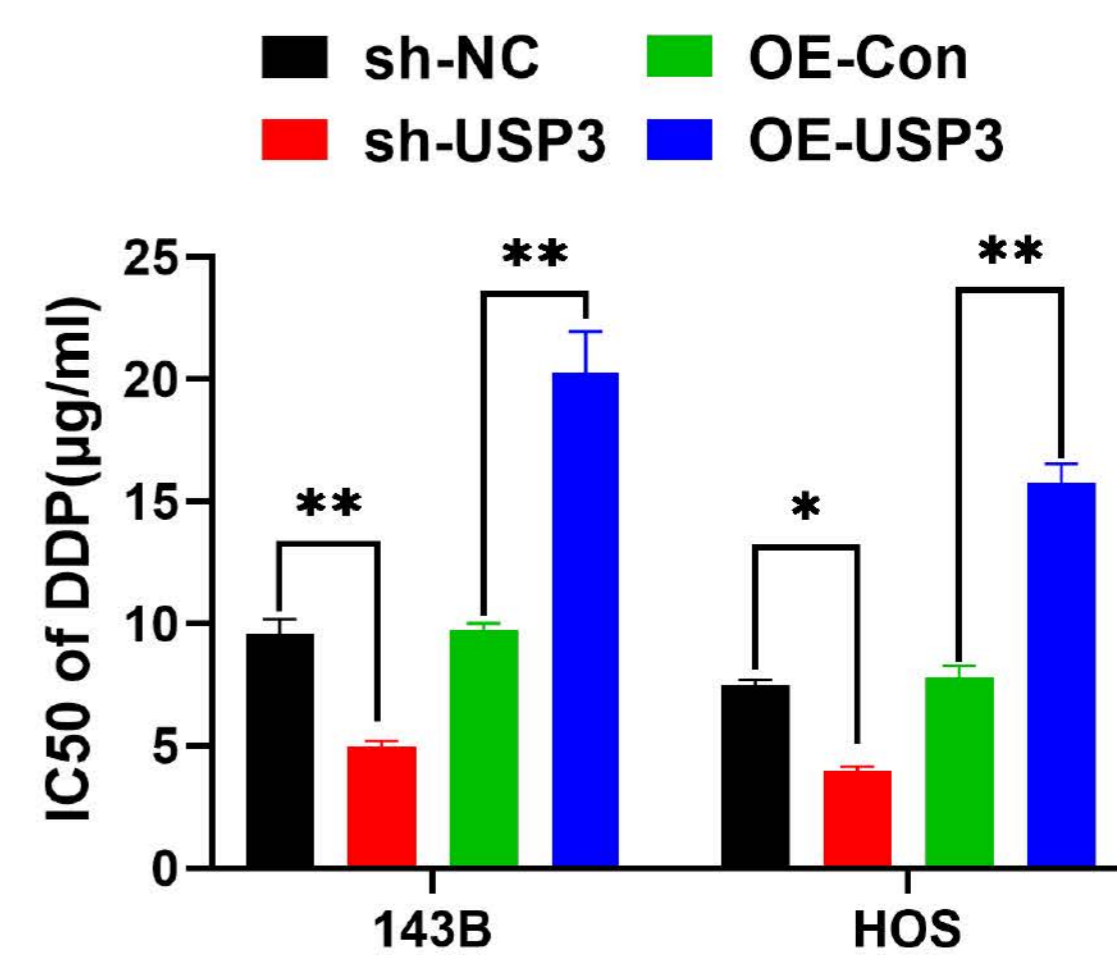

# Supplement figure 2

## A

ITM2C High Low

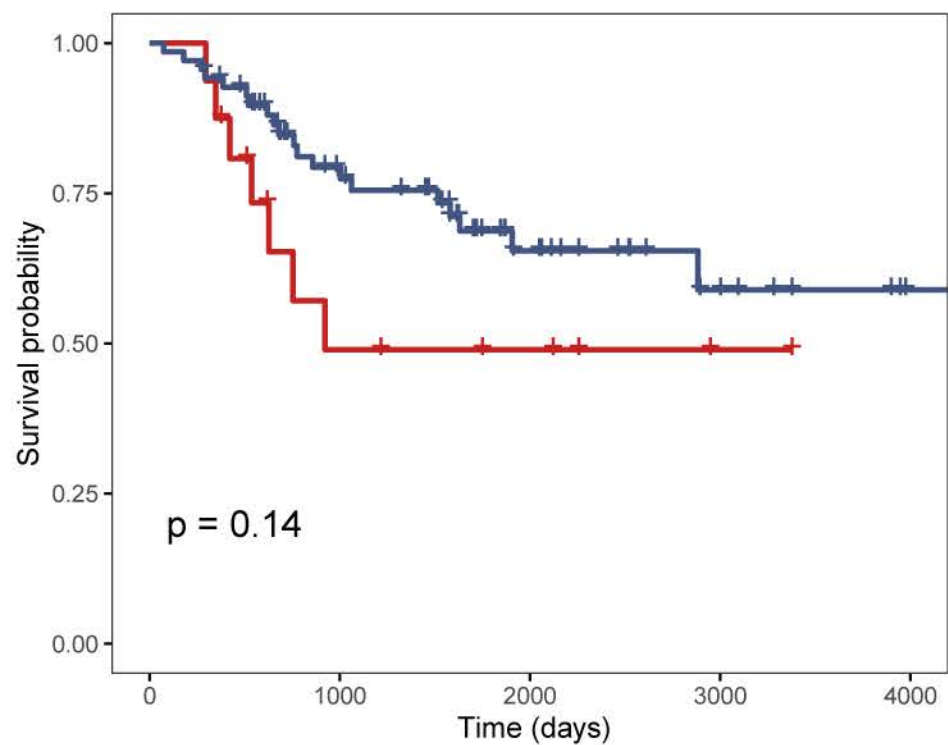

Number at risk

|      |    |    |    |   |   |
|------|----|----|----|---|---|
| High | 16 | 6  | 4  | 1 | 0 |
| Low  | 69 | 42 | 19 | 8 | 1 |

## B

PFN1 High Low

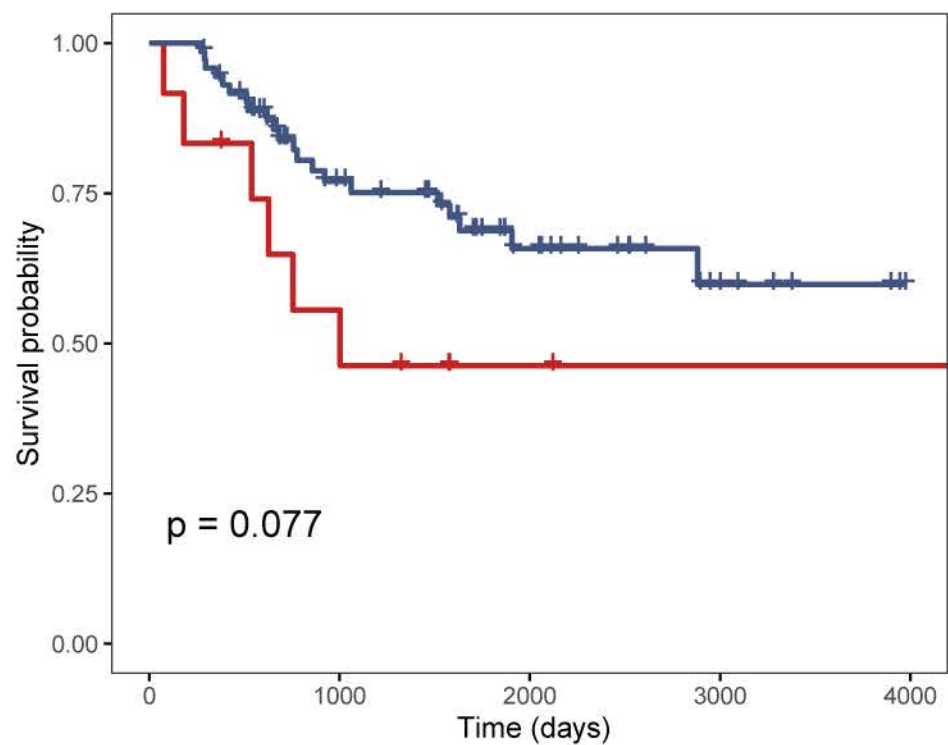

Number at risk

|      |    |    |    |   |   |
|------|----|----|----|---|---|
| High | 12 | 6  | 2  | 1 | 1 |
| Low  | 73 | 42 | 21 | 8 | 0 |

## C

RAD18 High Low

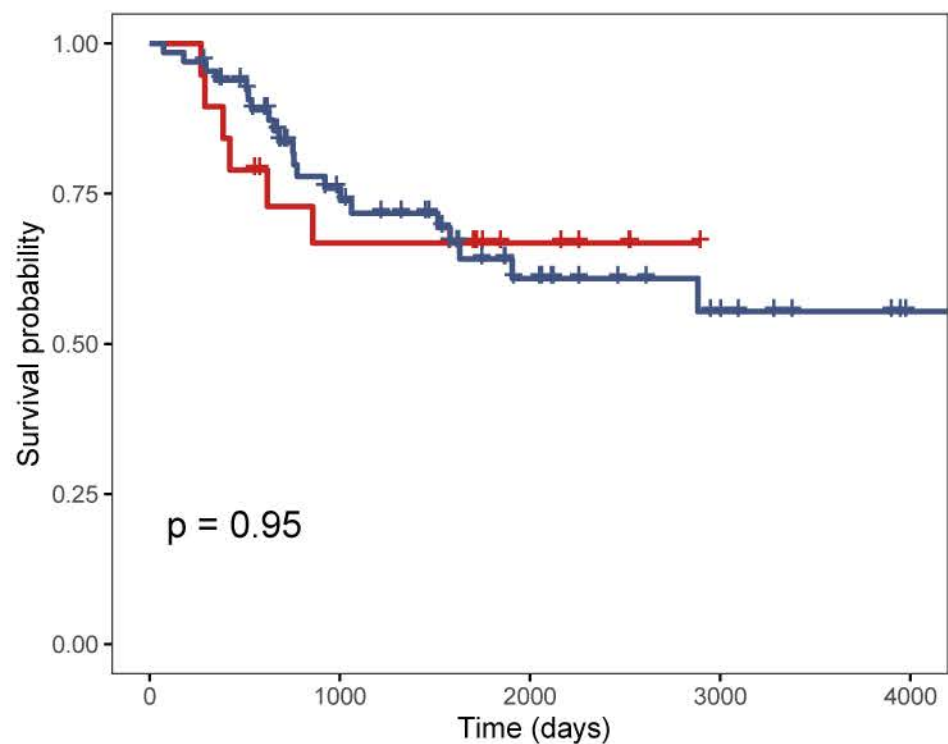

Number at risk

|      |    |    |    |   |   |
|------|----|----|----|---|---|
| High | 19 | 11 | 5  | 0 | 0 |
| Low  | 66 | 37 | 18 | 9 | 1 |

## D

USP5 High Low

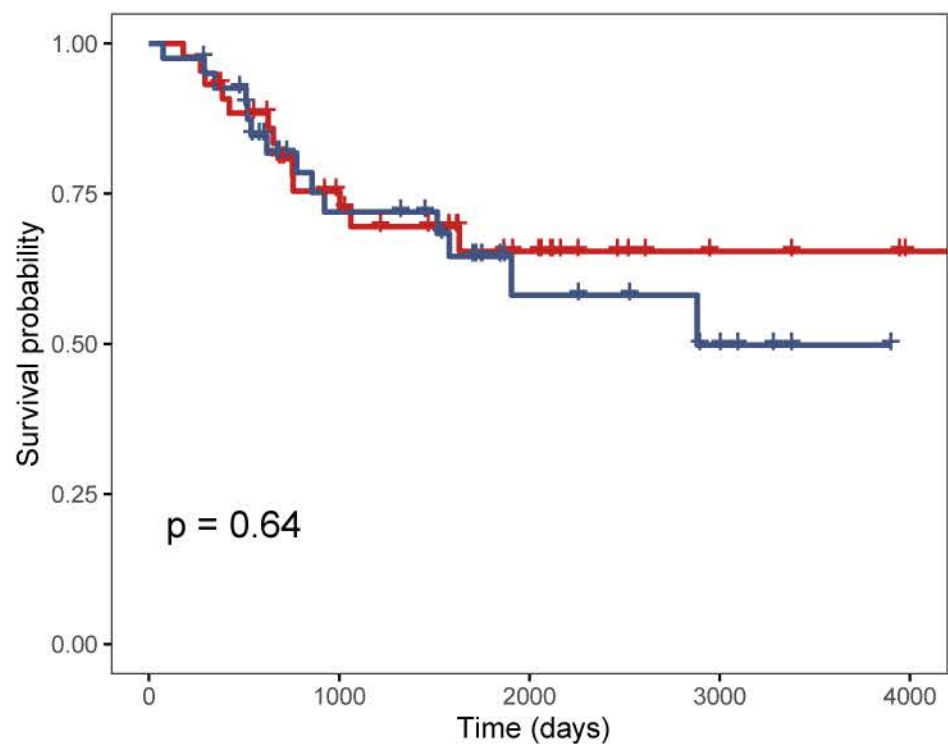

Number at risk

|      |    |    |    |   |   |
|------|----|----|----|---|---|
| High | 44 | 26 | 14 | 4 | 1 |
| Low  | 41 | 22 | 9  | 5 | 0 |

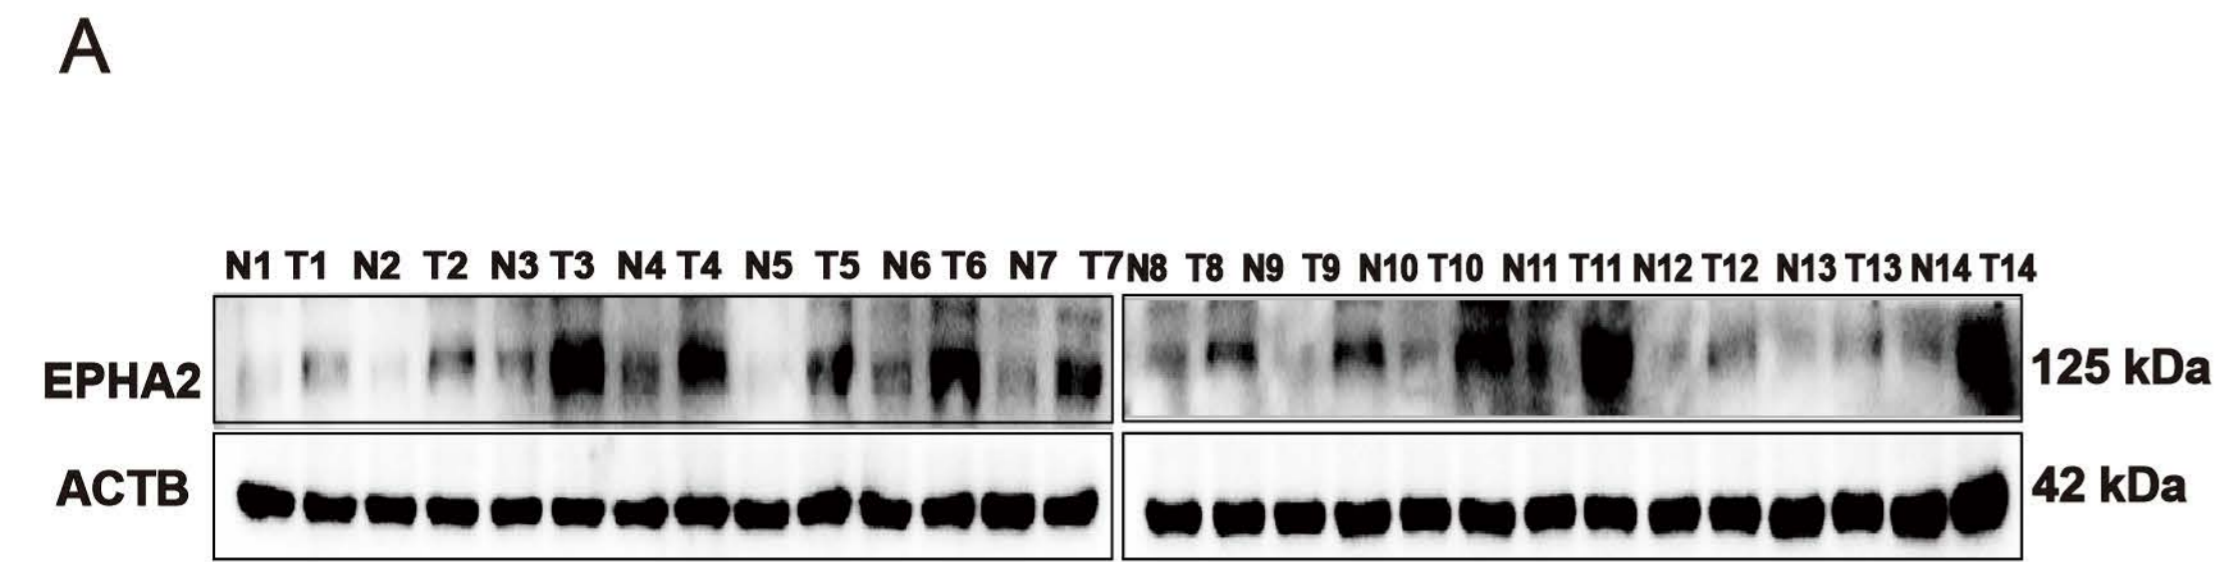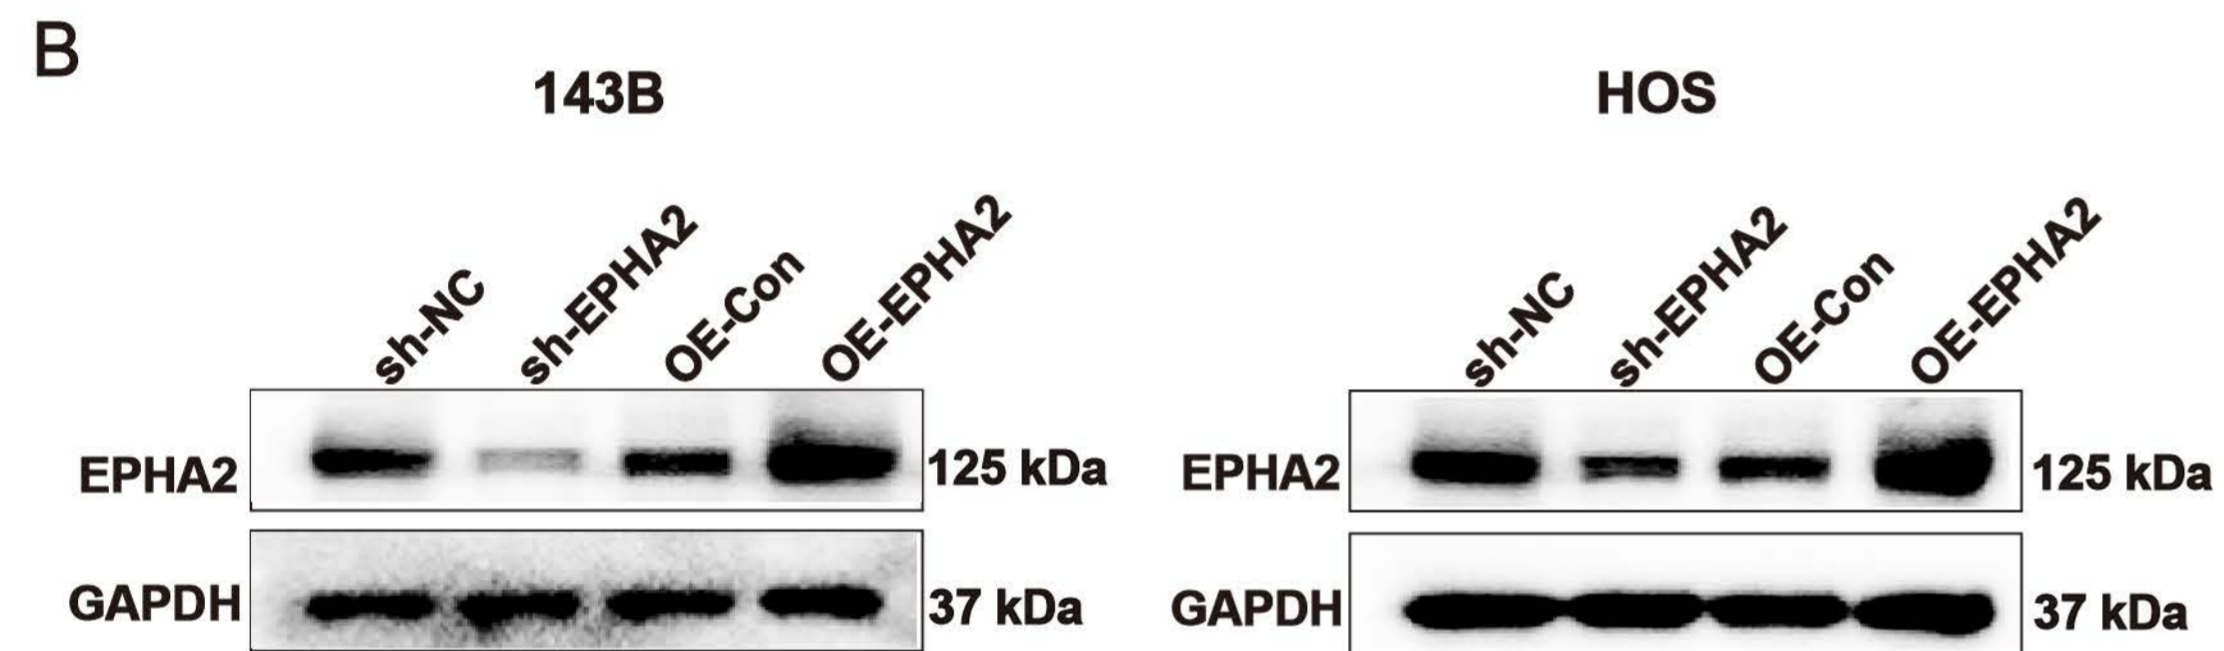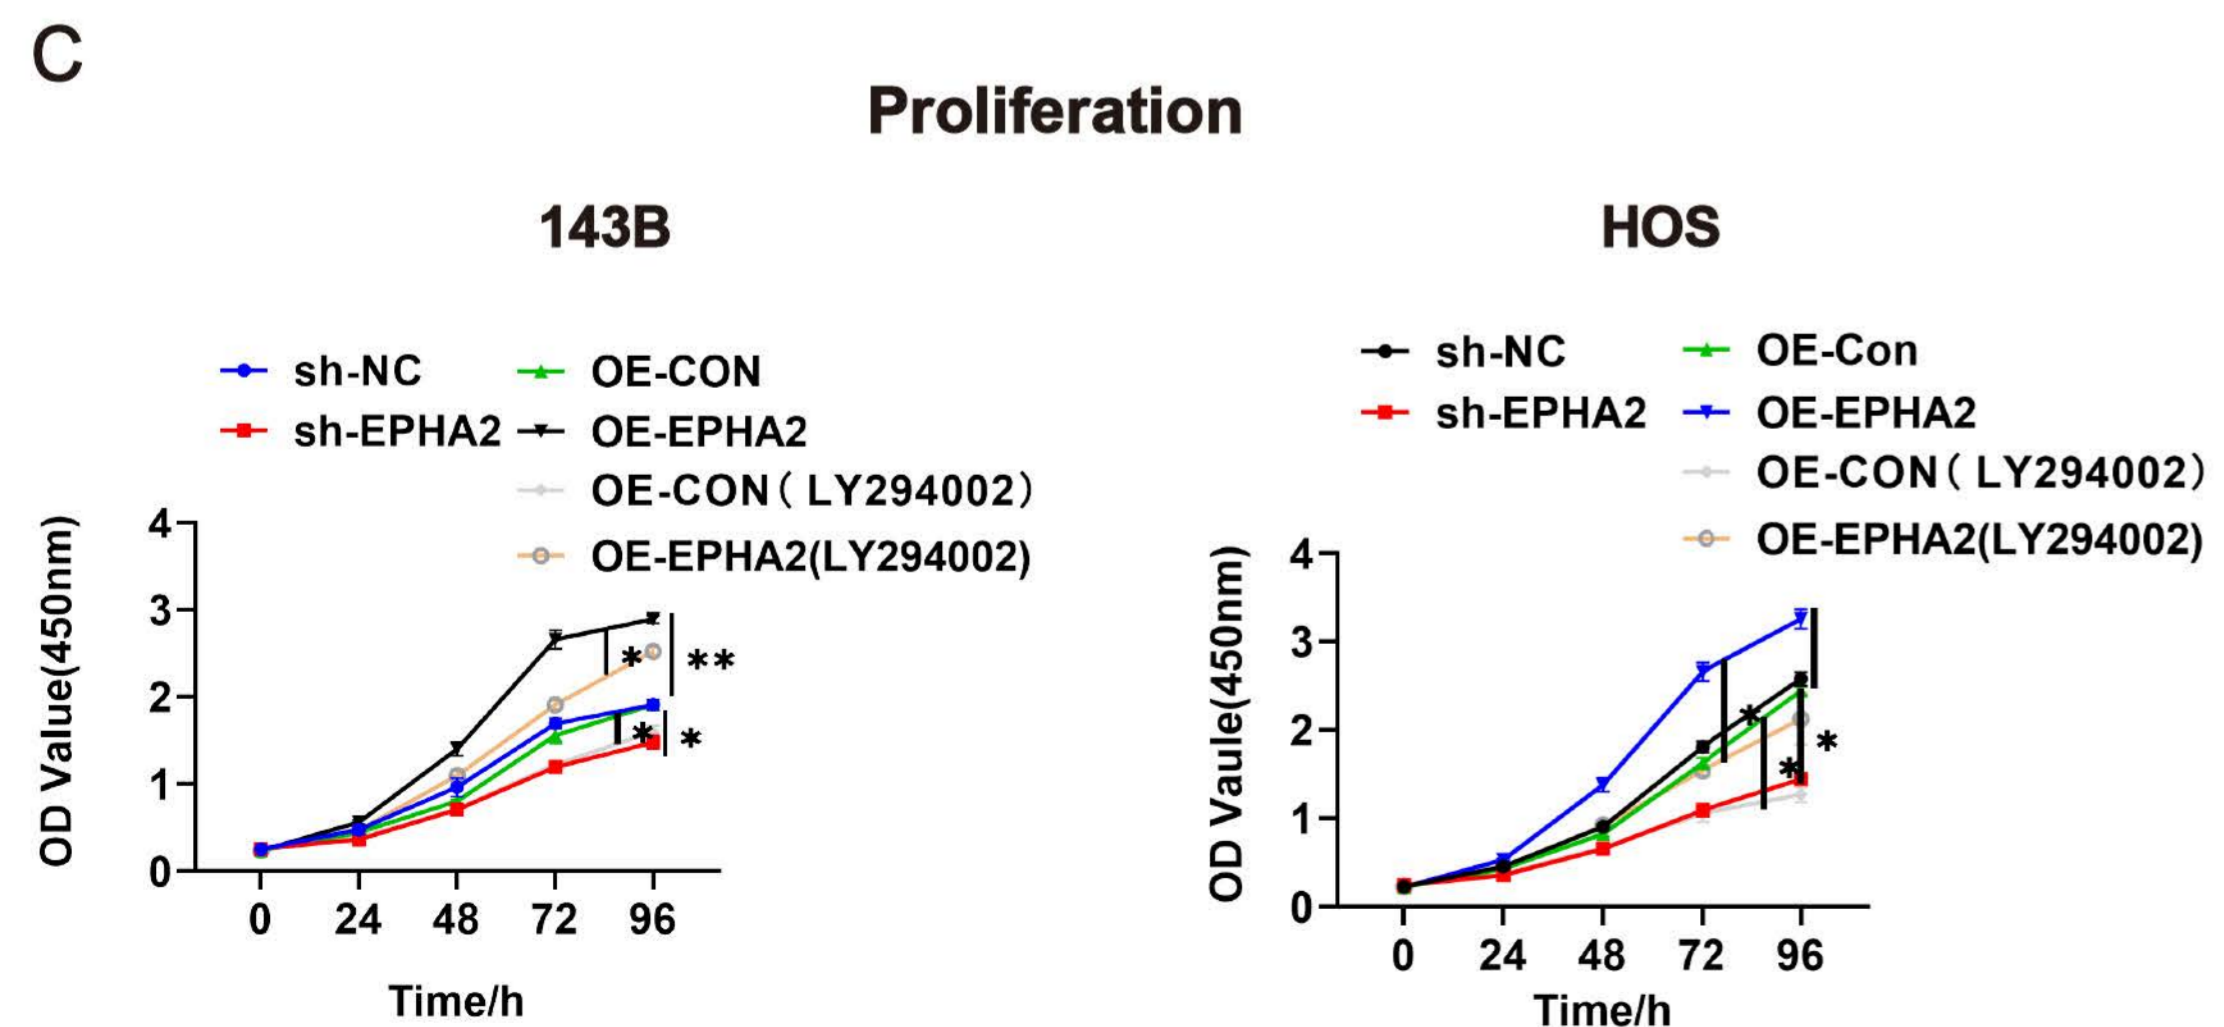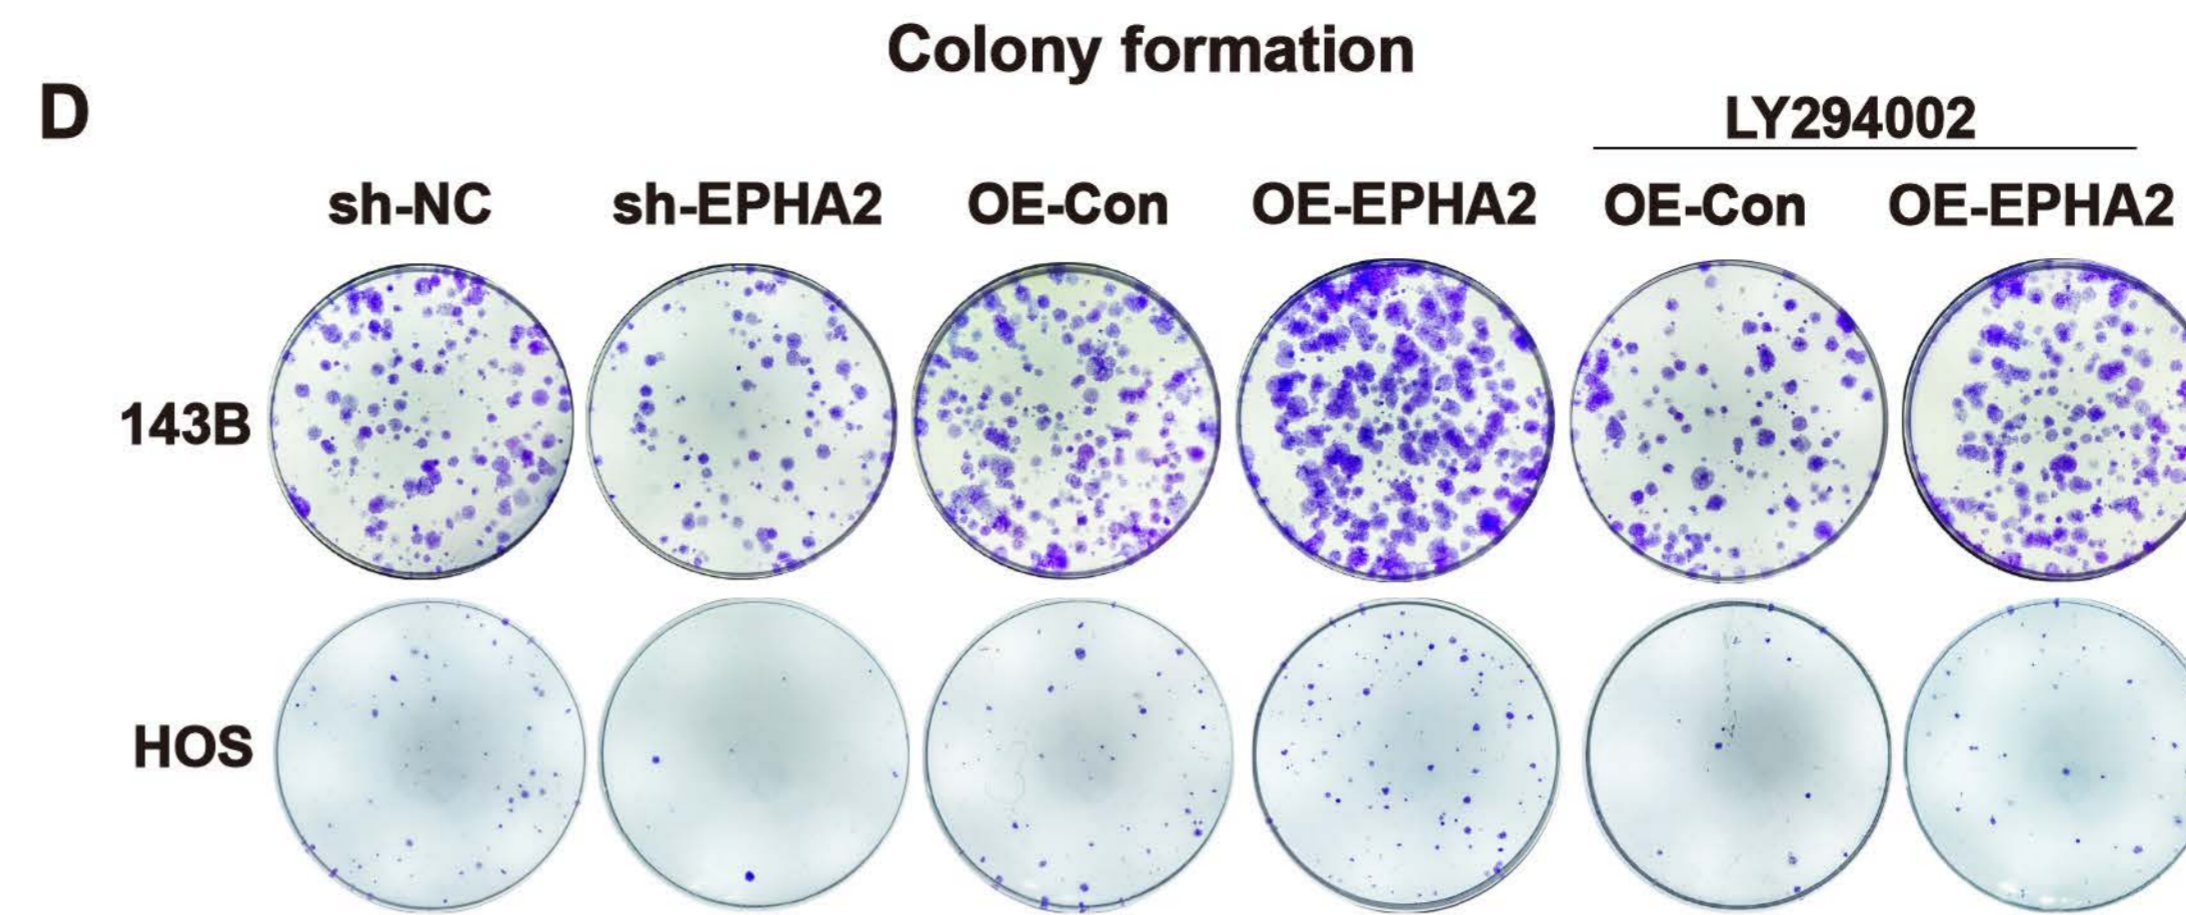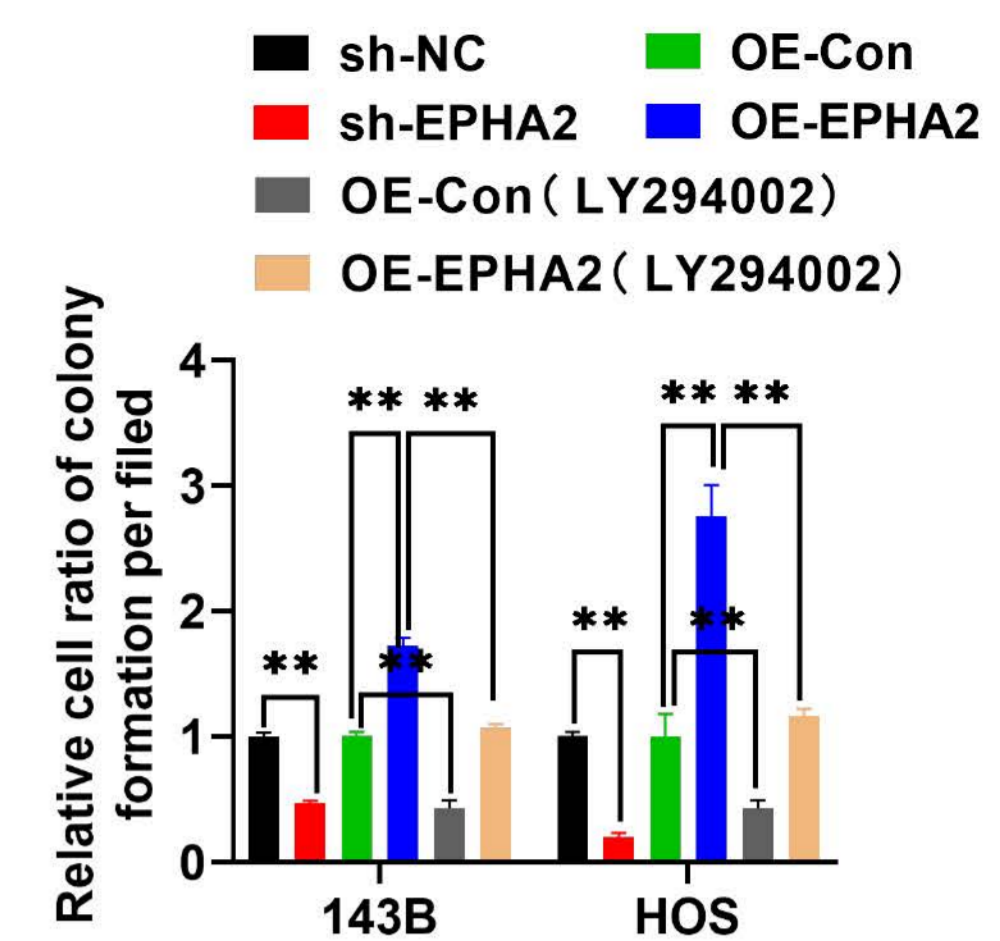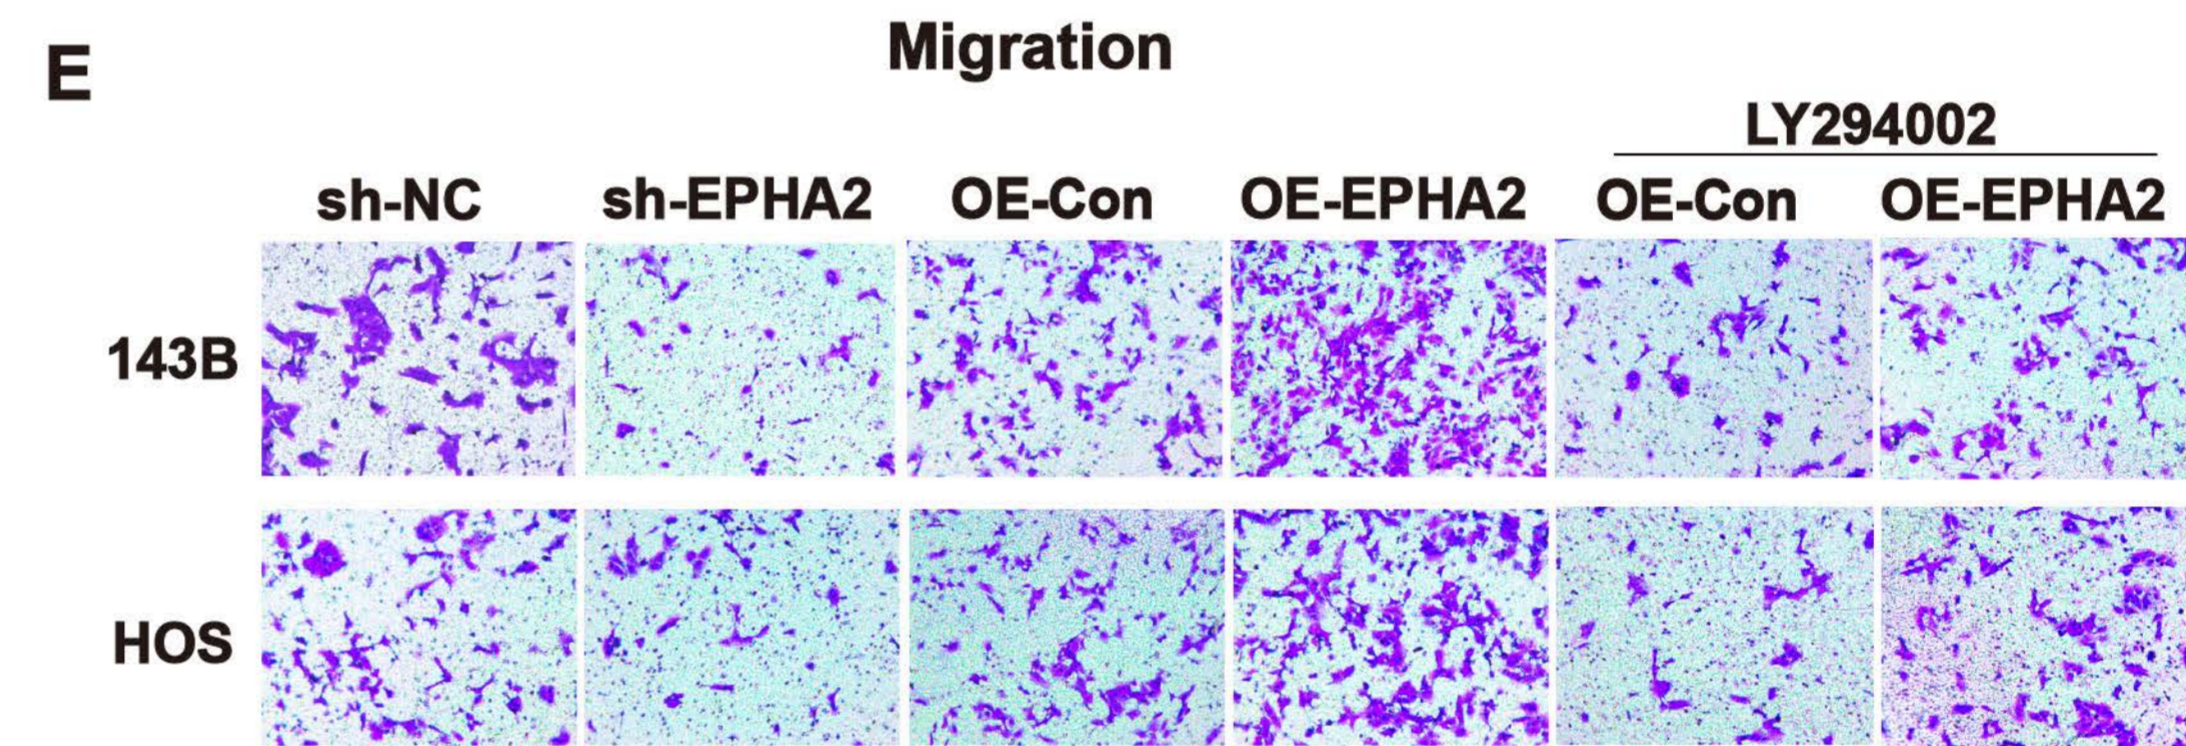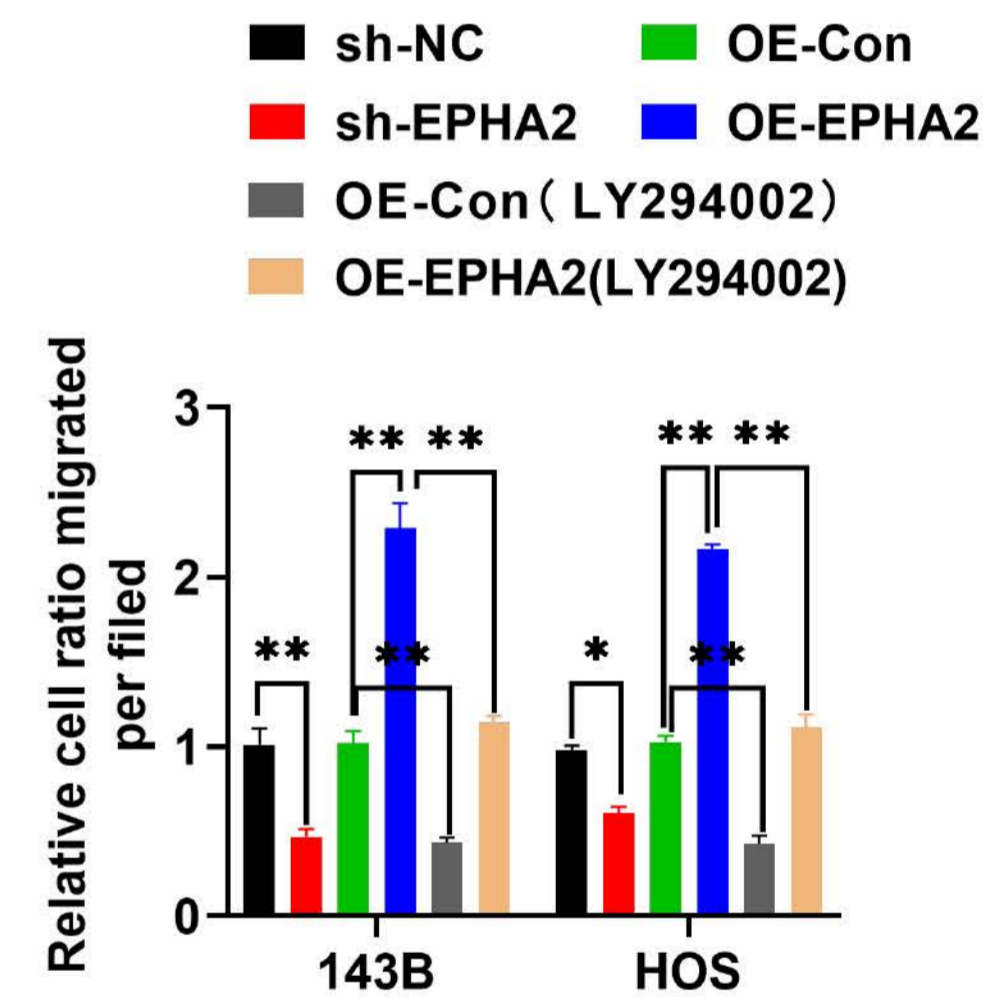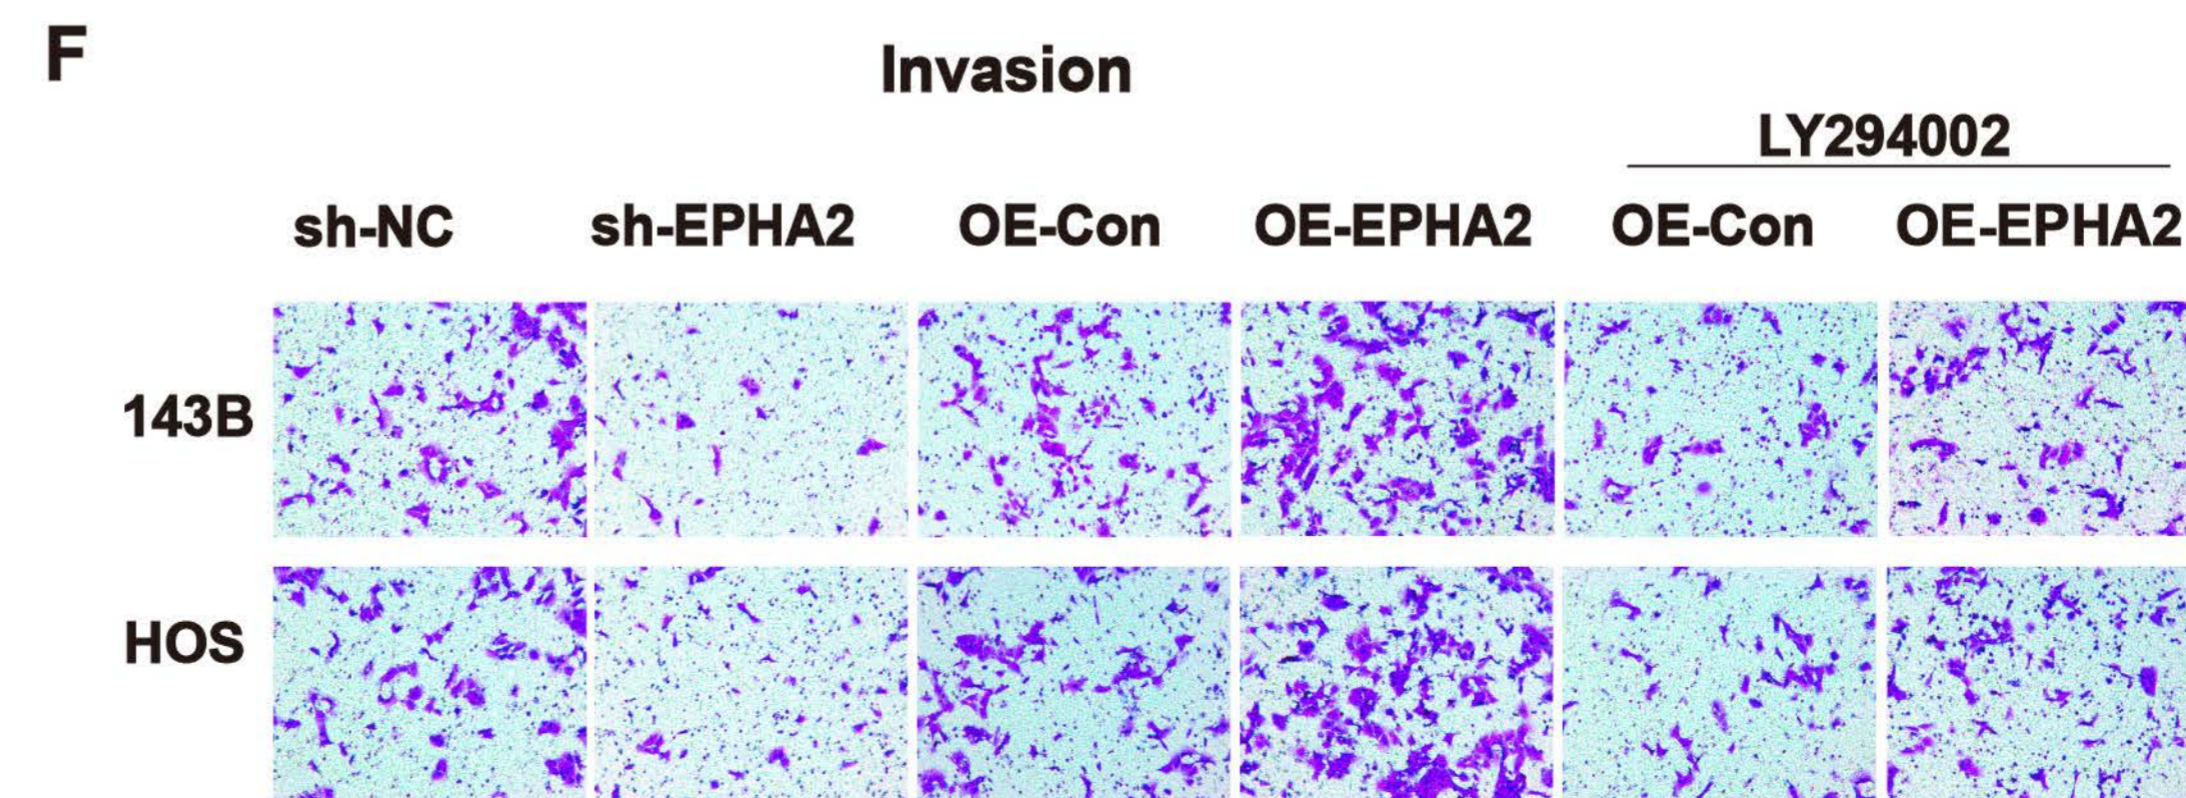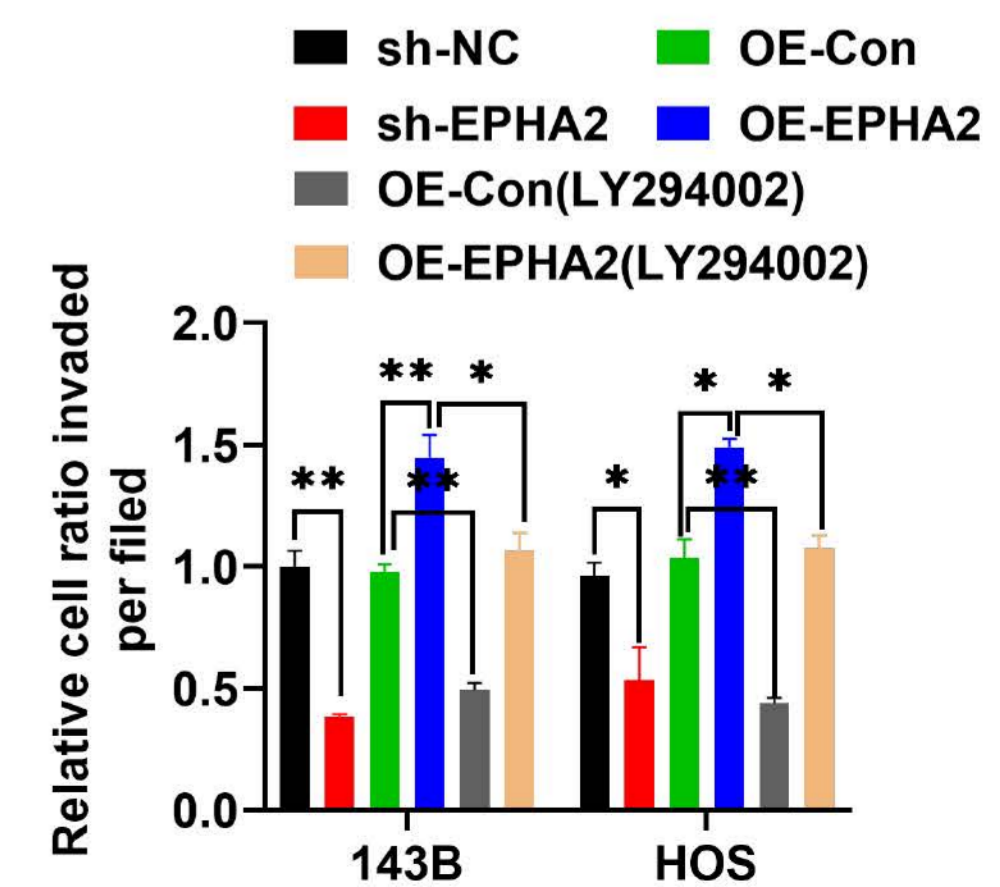

## Supplement figure 4

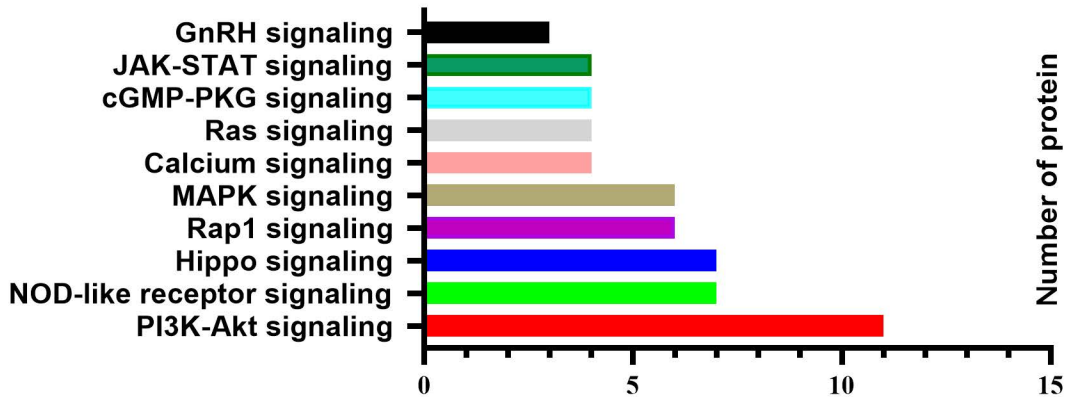

**A**

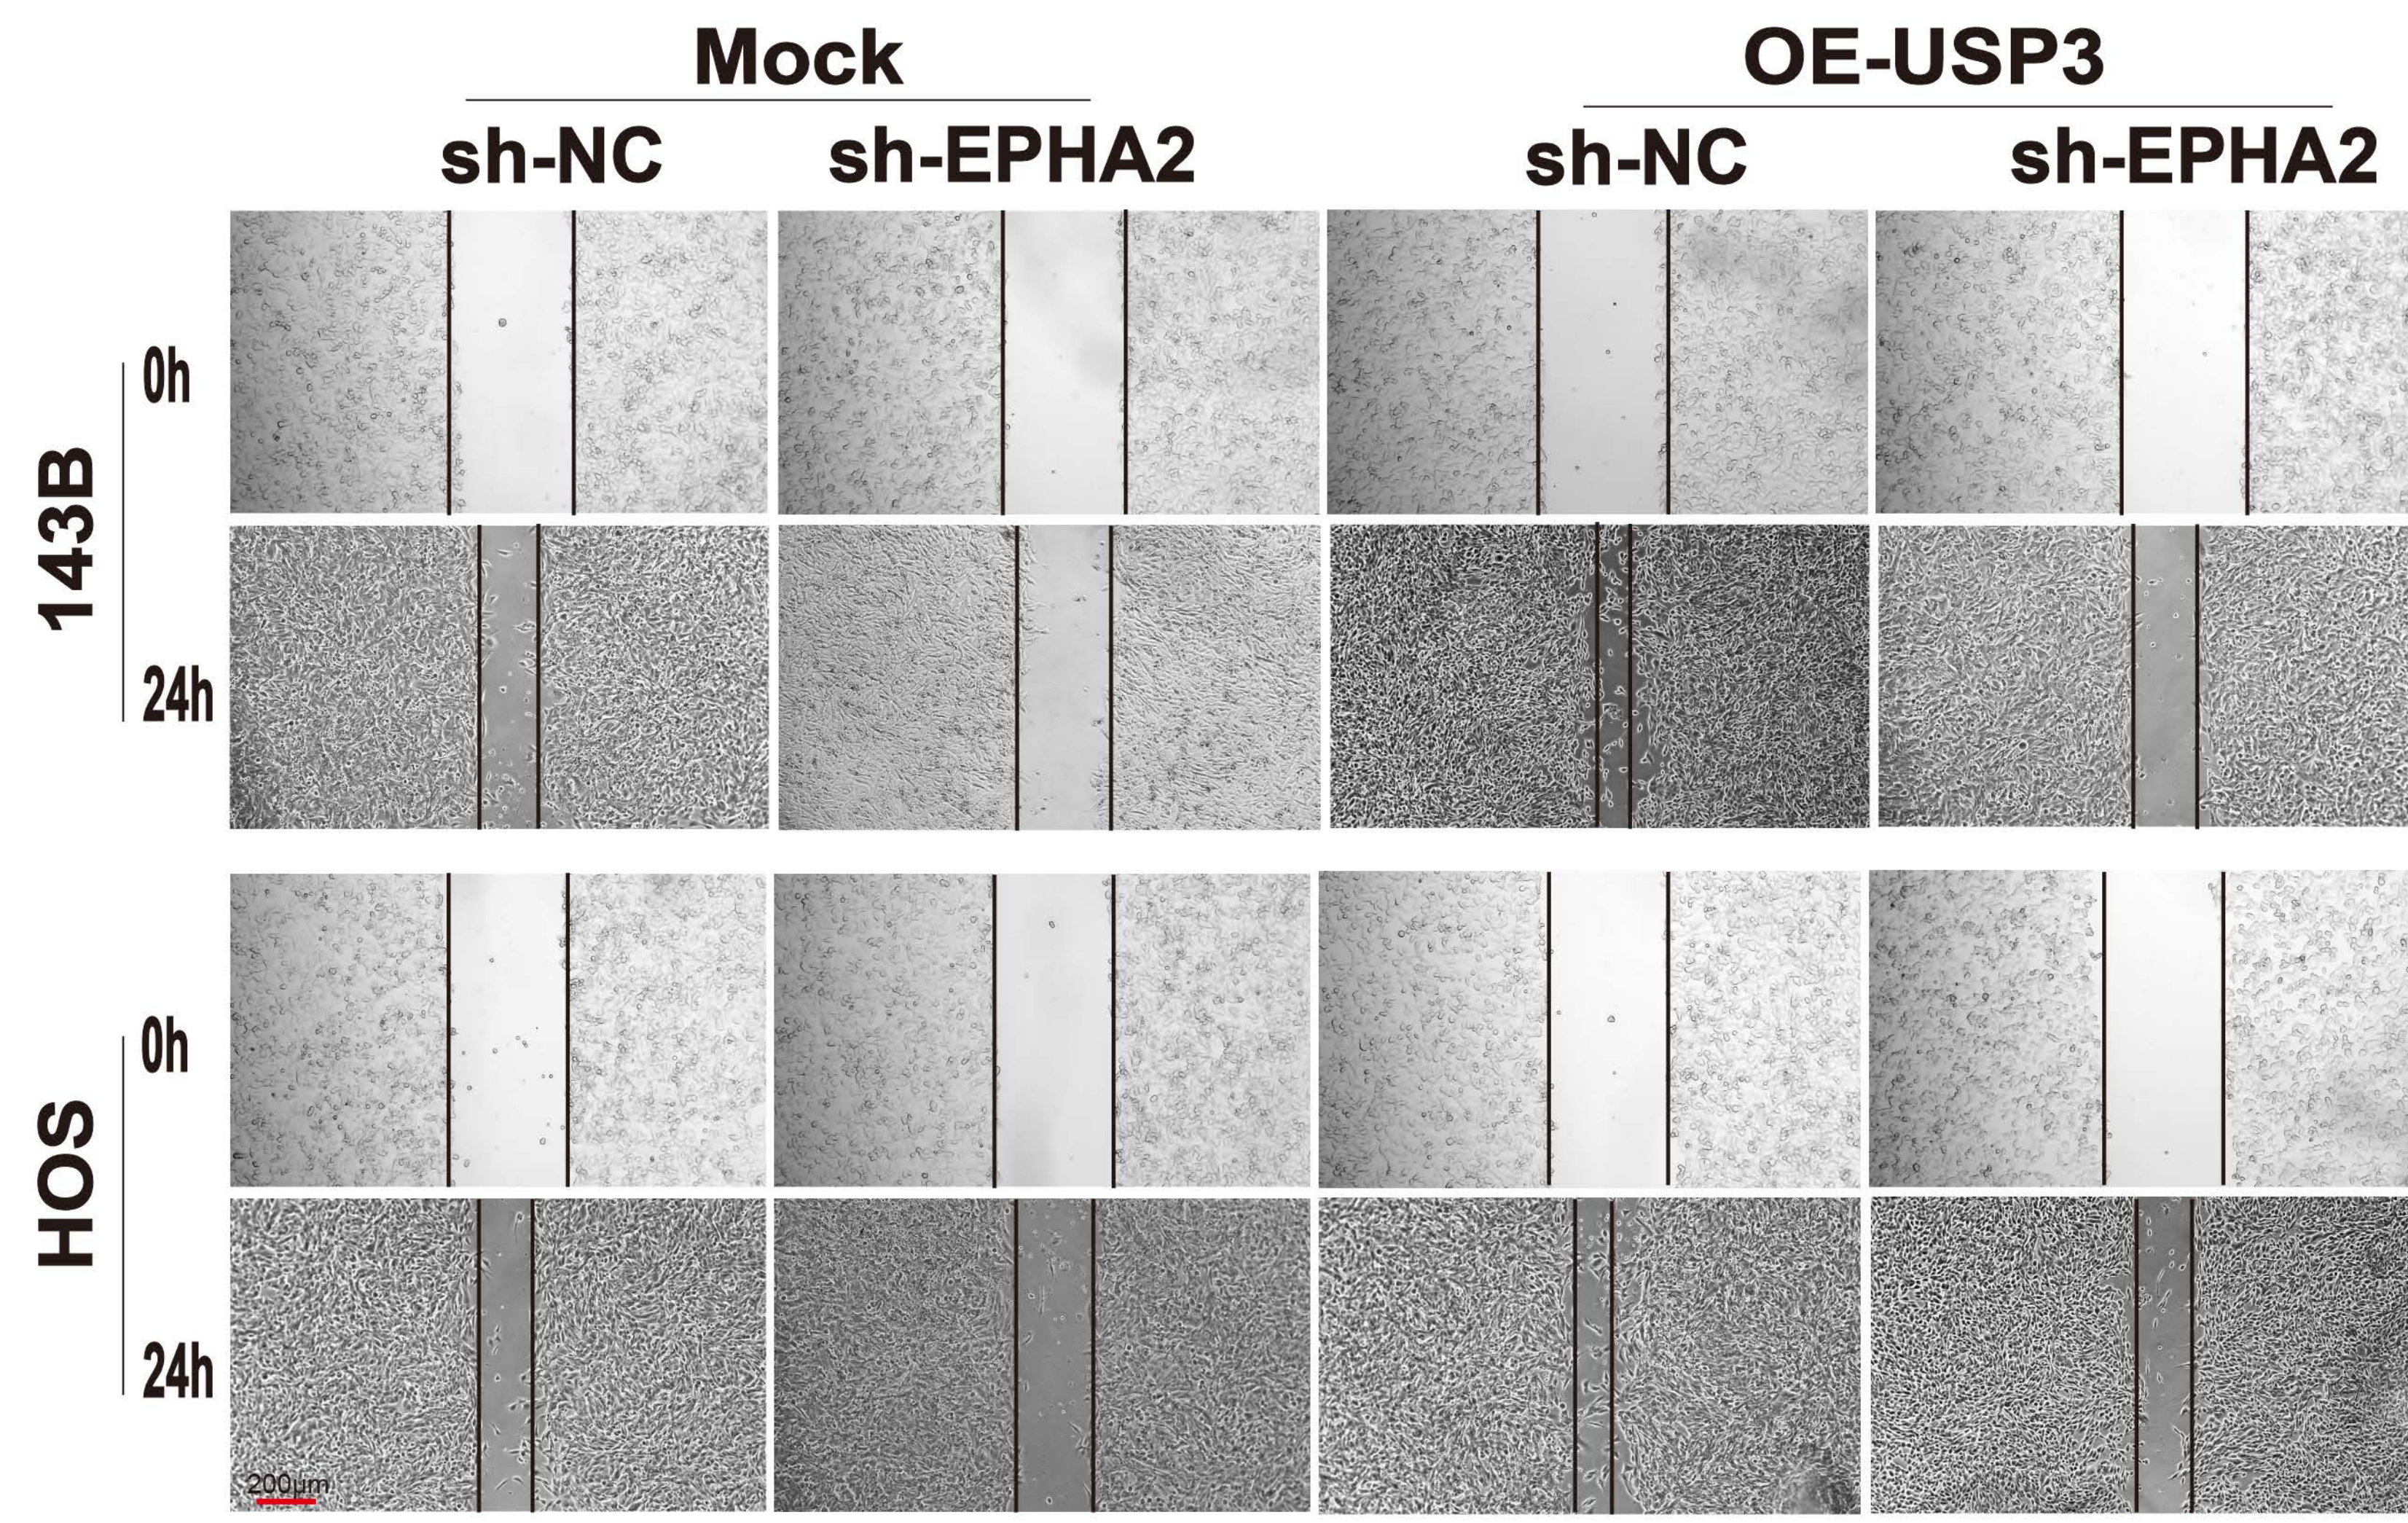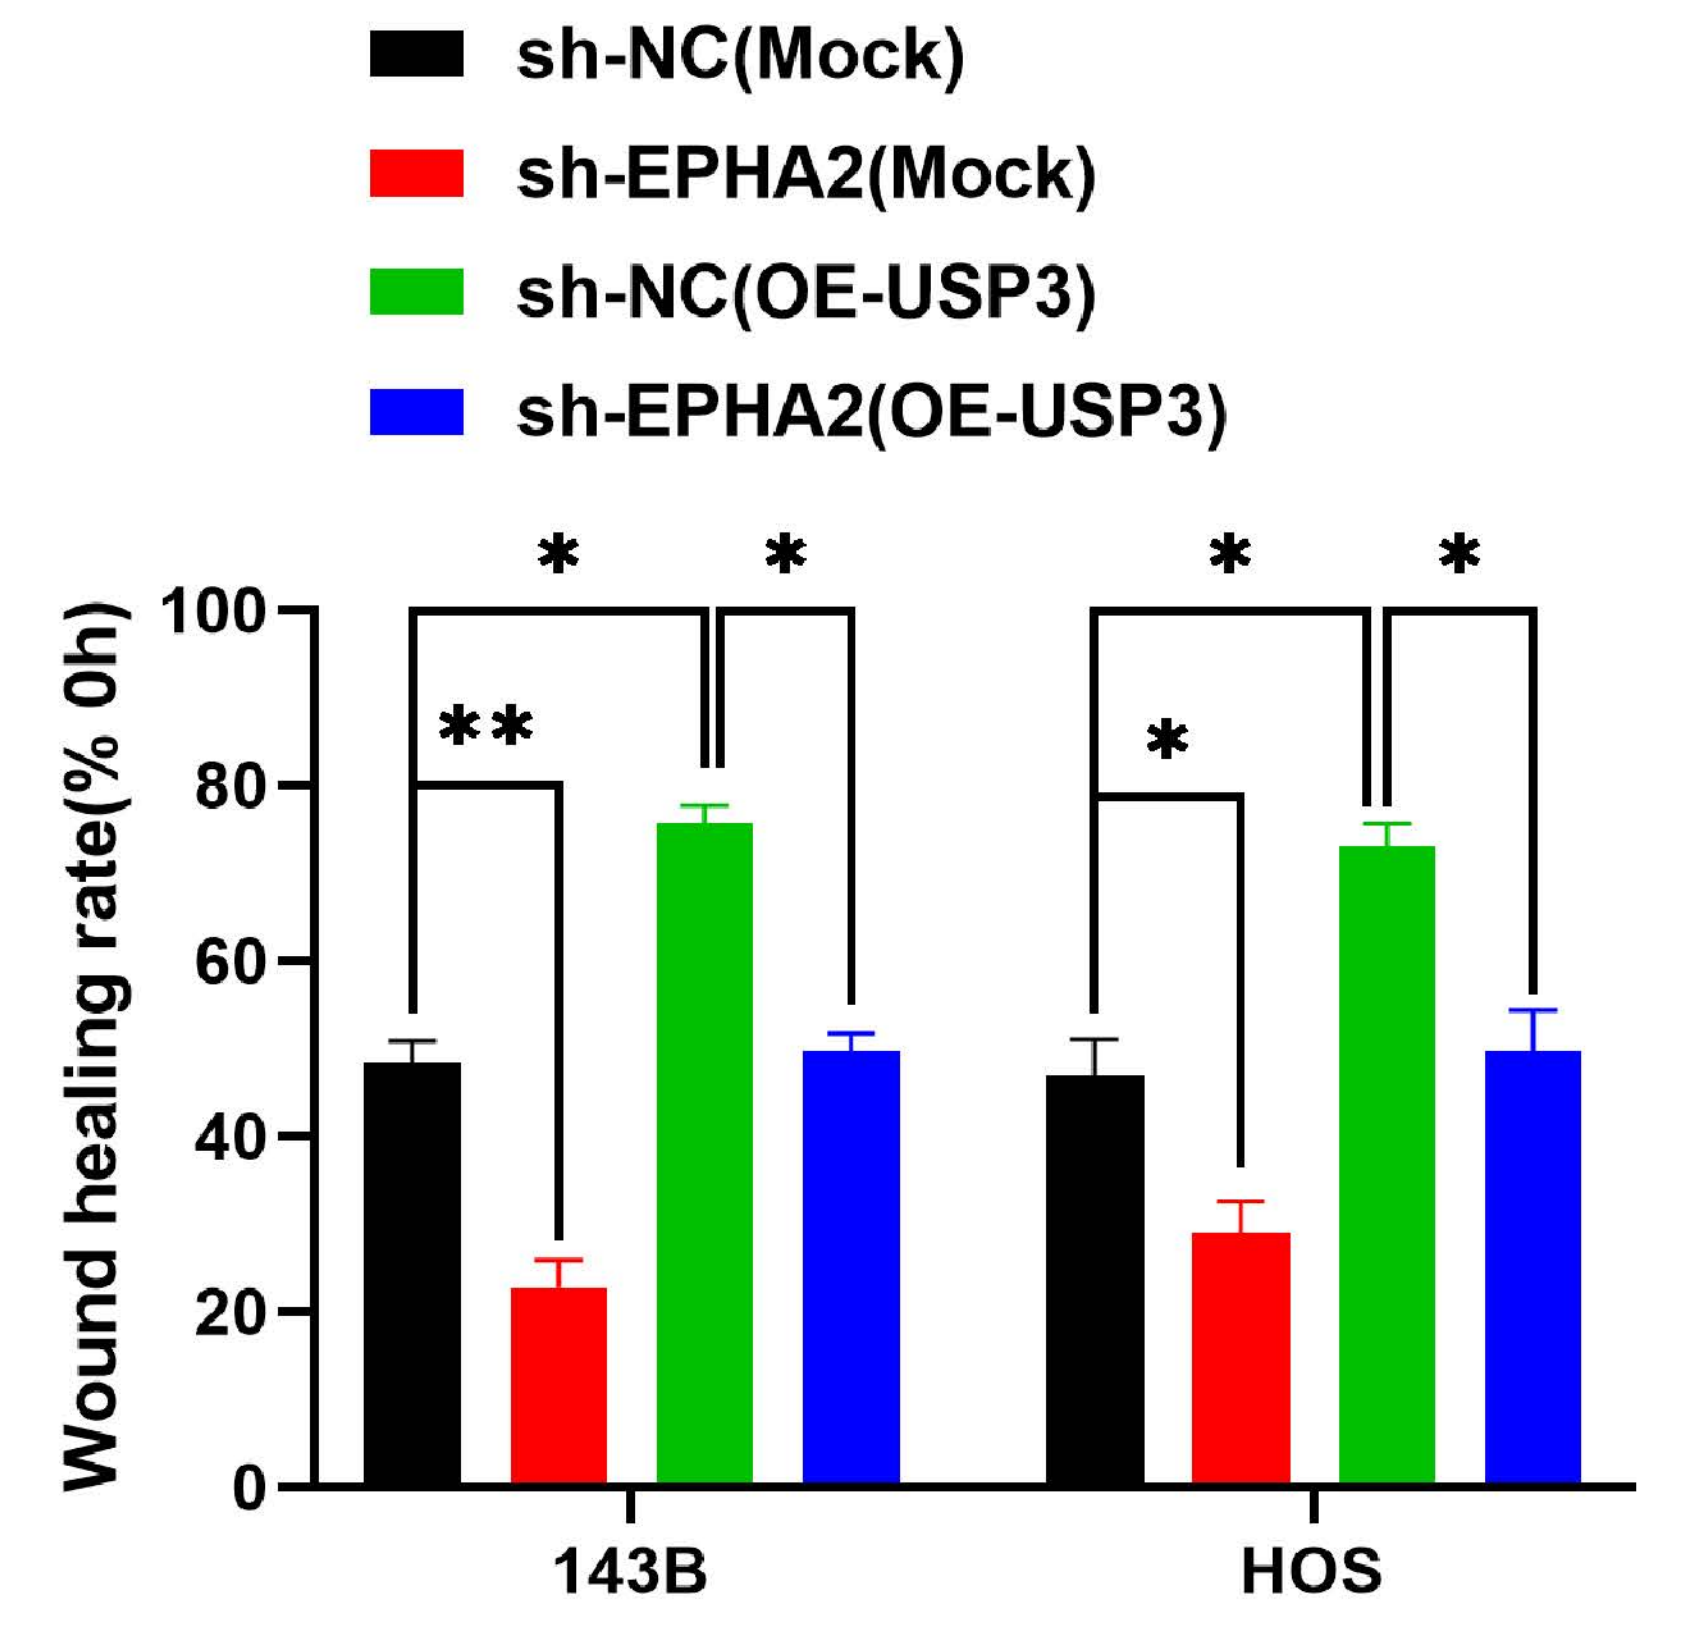

**B**

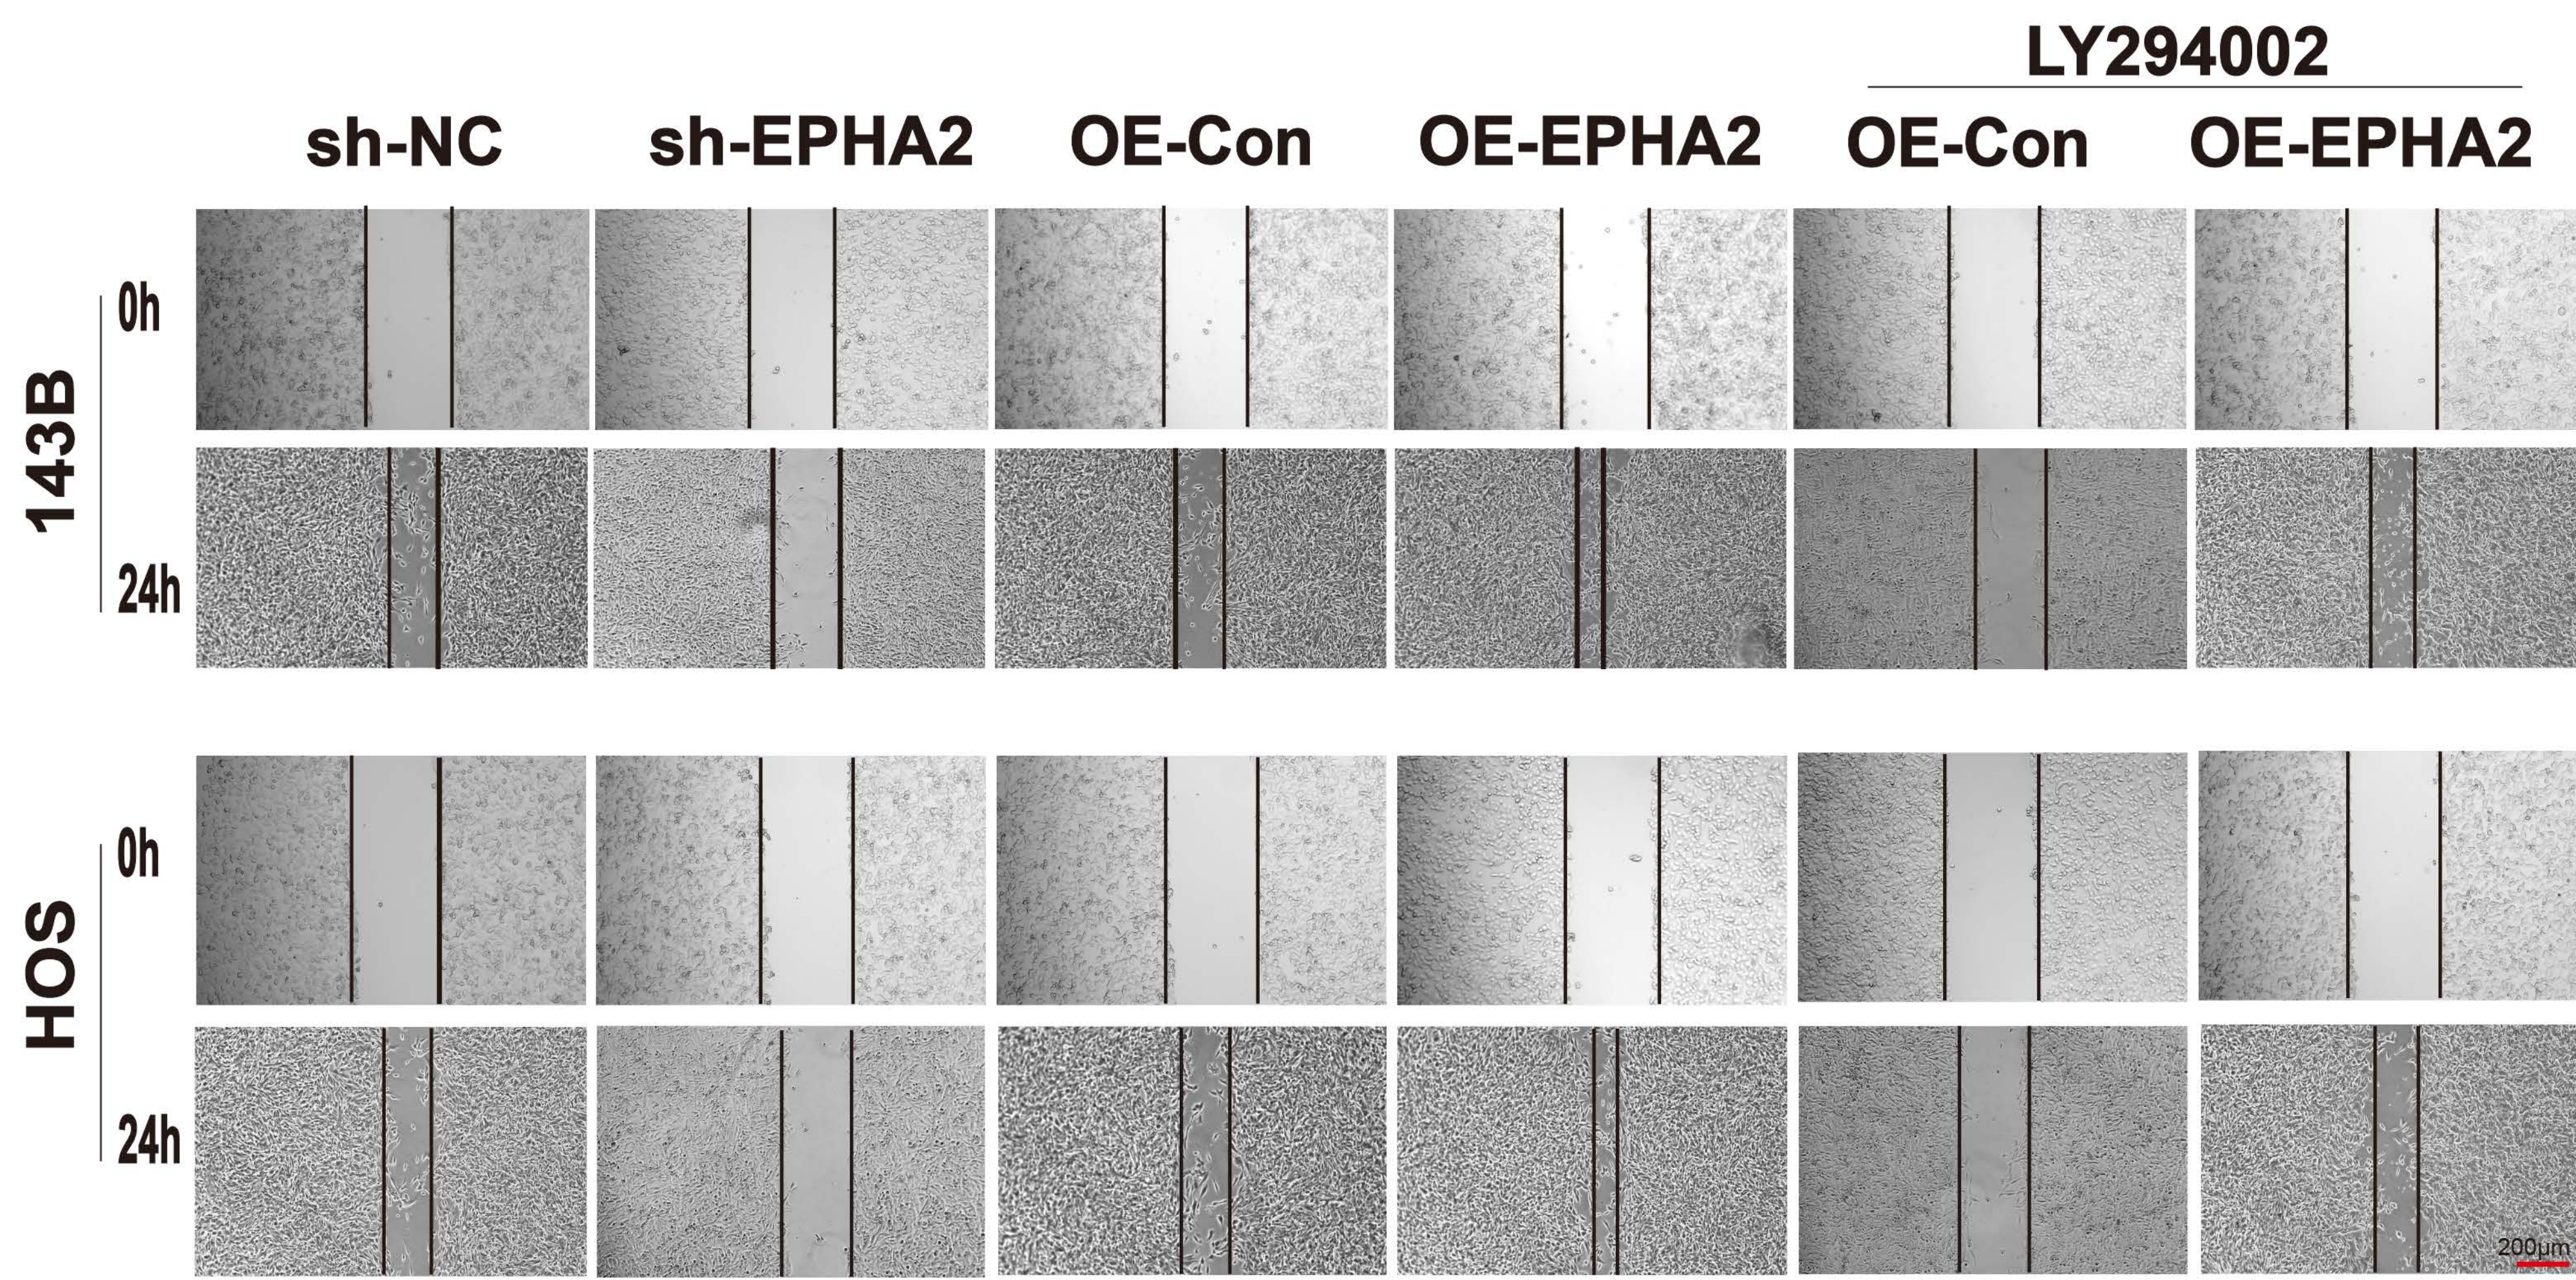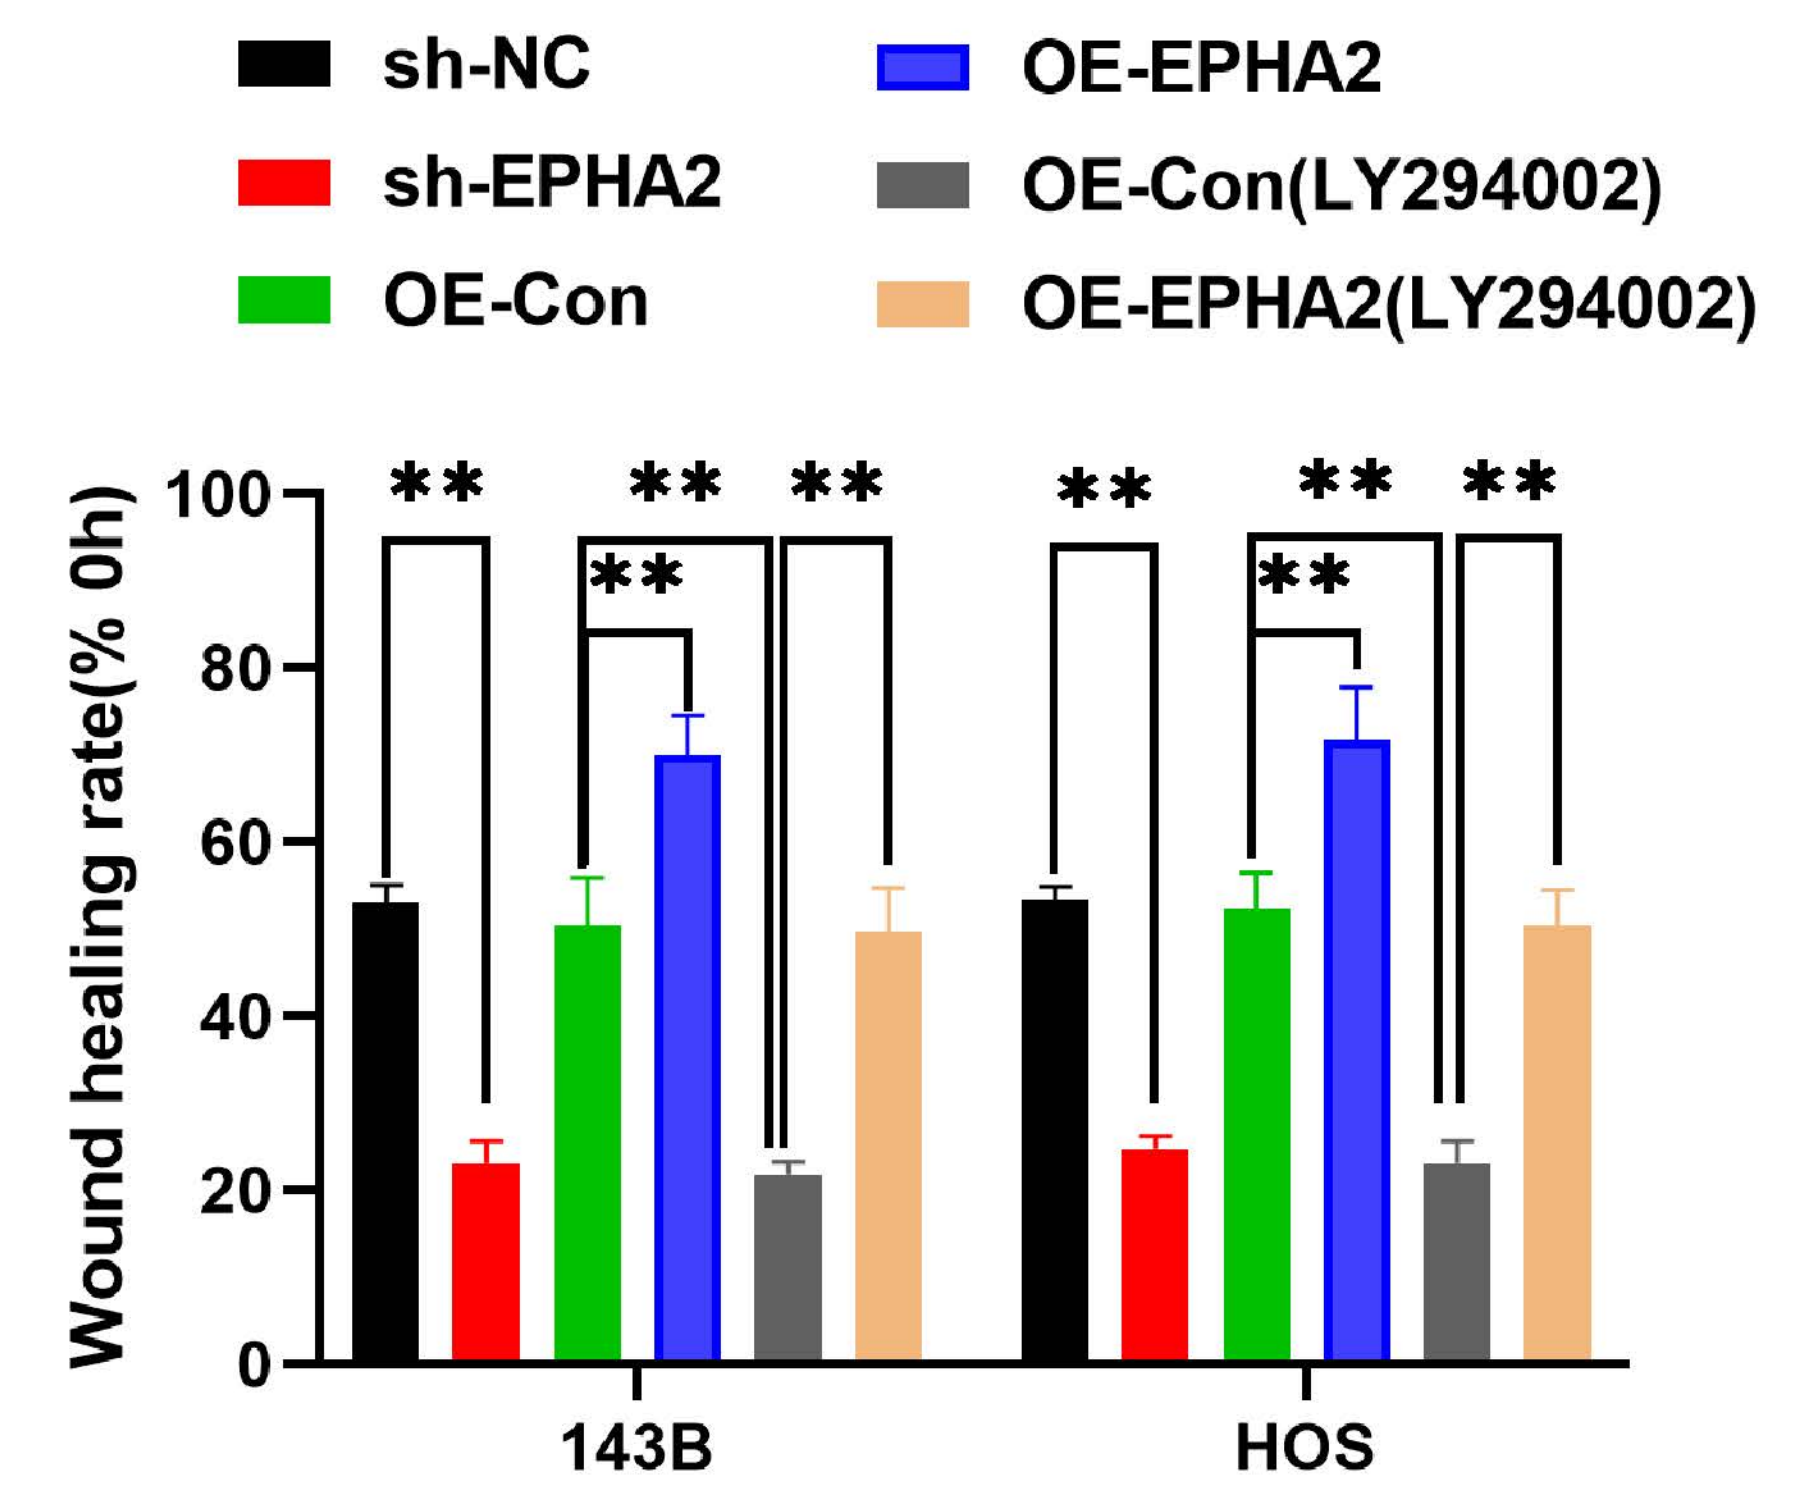

# Supplement figure 6

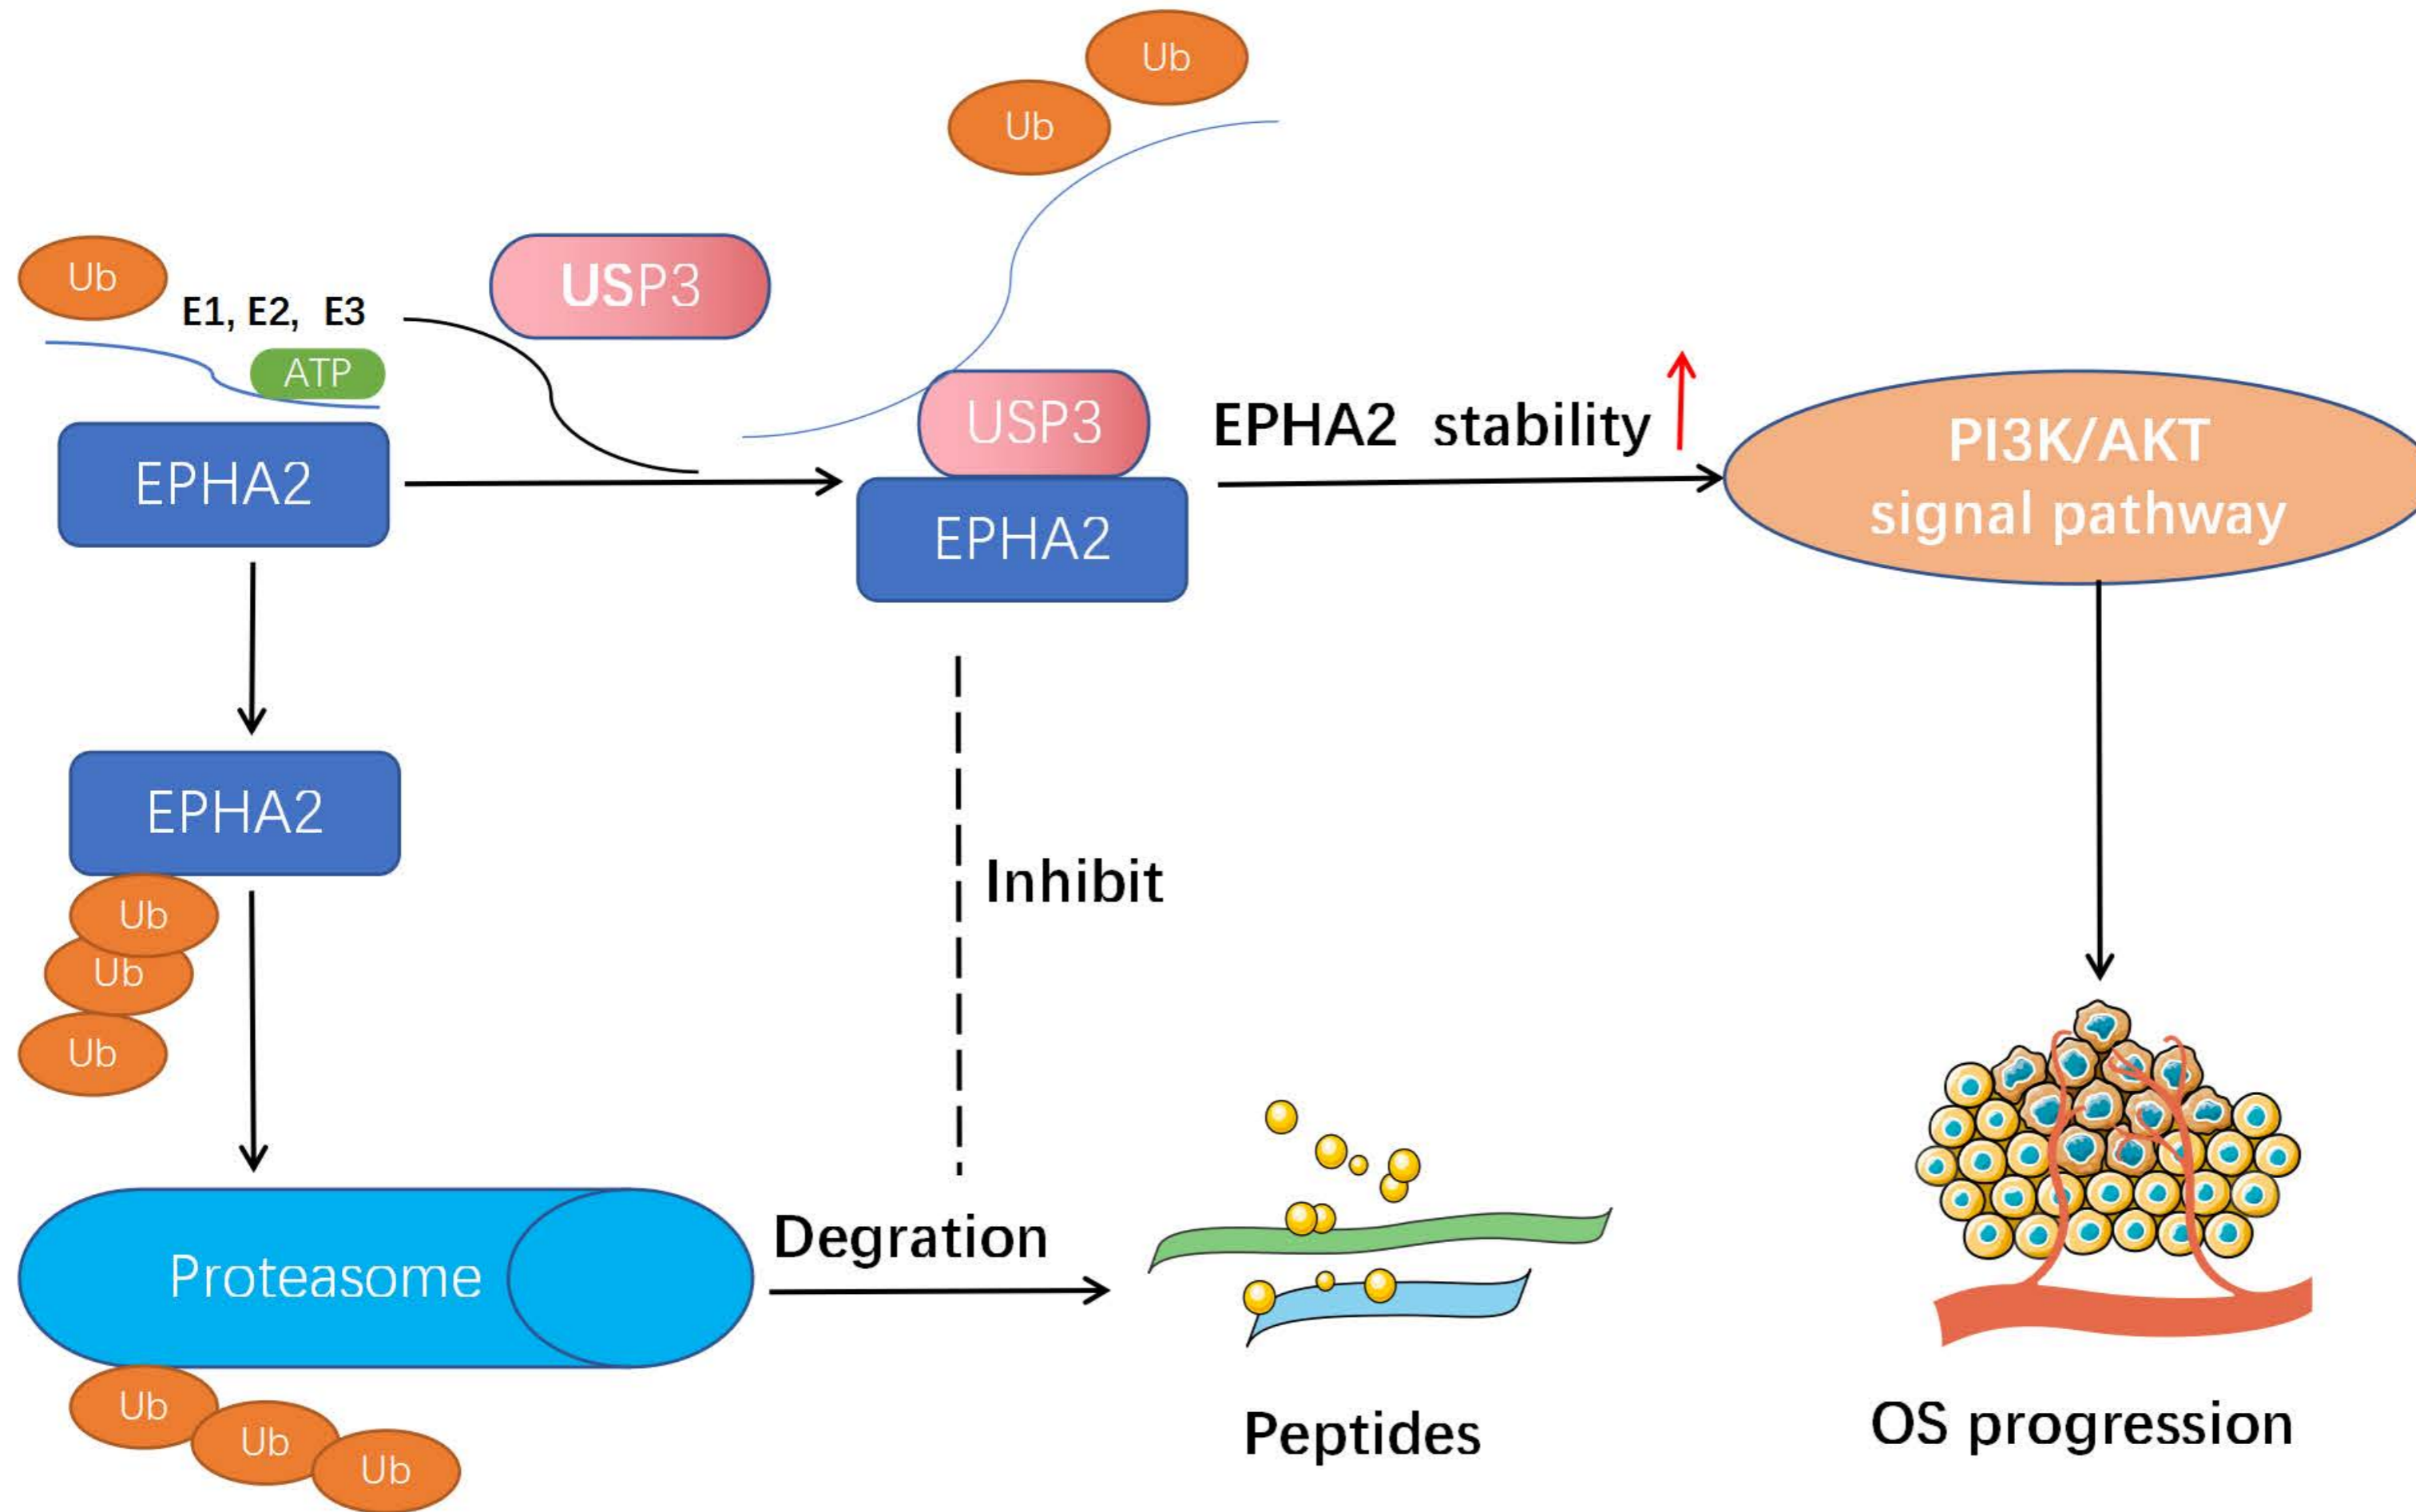

Supplement: 41419_2024_6624_MOESM1_ESM.pdf [file 41419_2024_6624_MOESM1_ESM.pdf]
